# Supplementary material for: Ecomorphological divergence and habitat lability in the context of robust patterns of modularity in the cichlid feeding apparatus
Source: PubMed Central journal article supplement (PMC7393717; doi:10.1186/s12862-020-01648-x), 2020-07-31

**Figure S2. Maxilla and Pre-maxilla Landmarking Schemes**

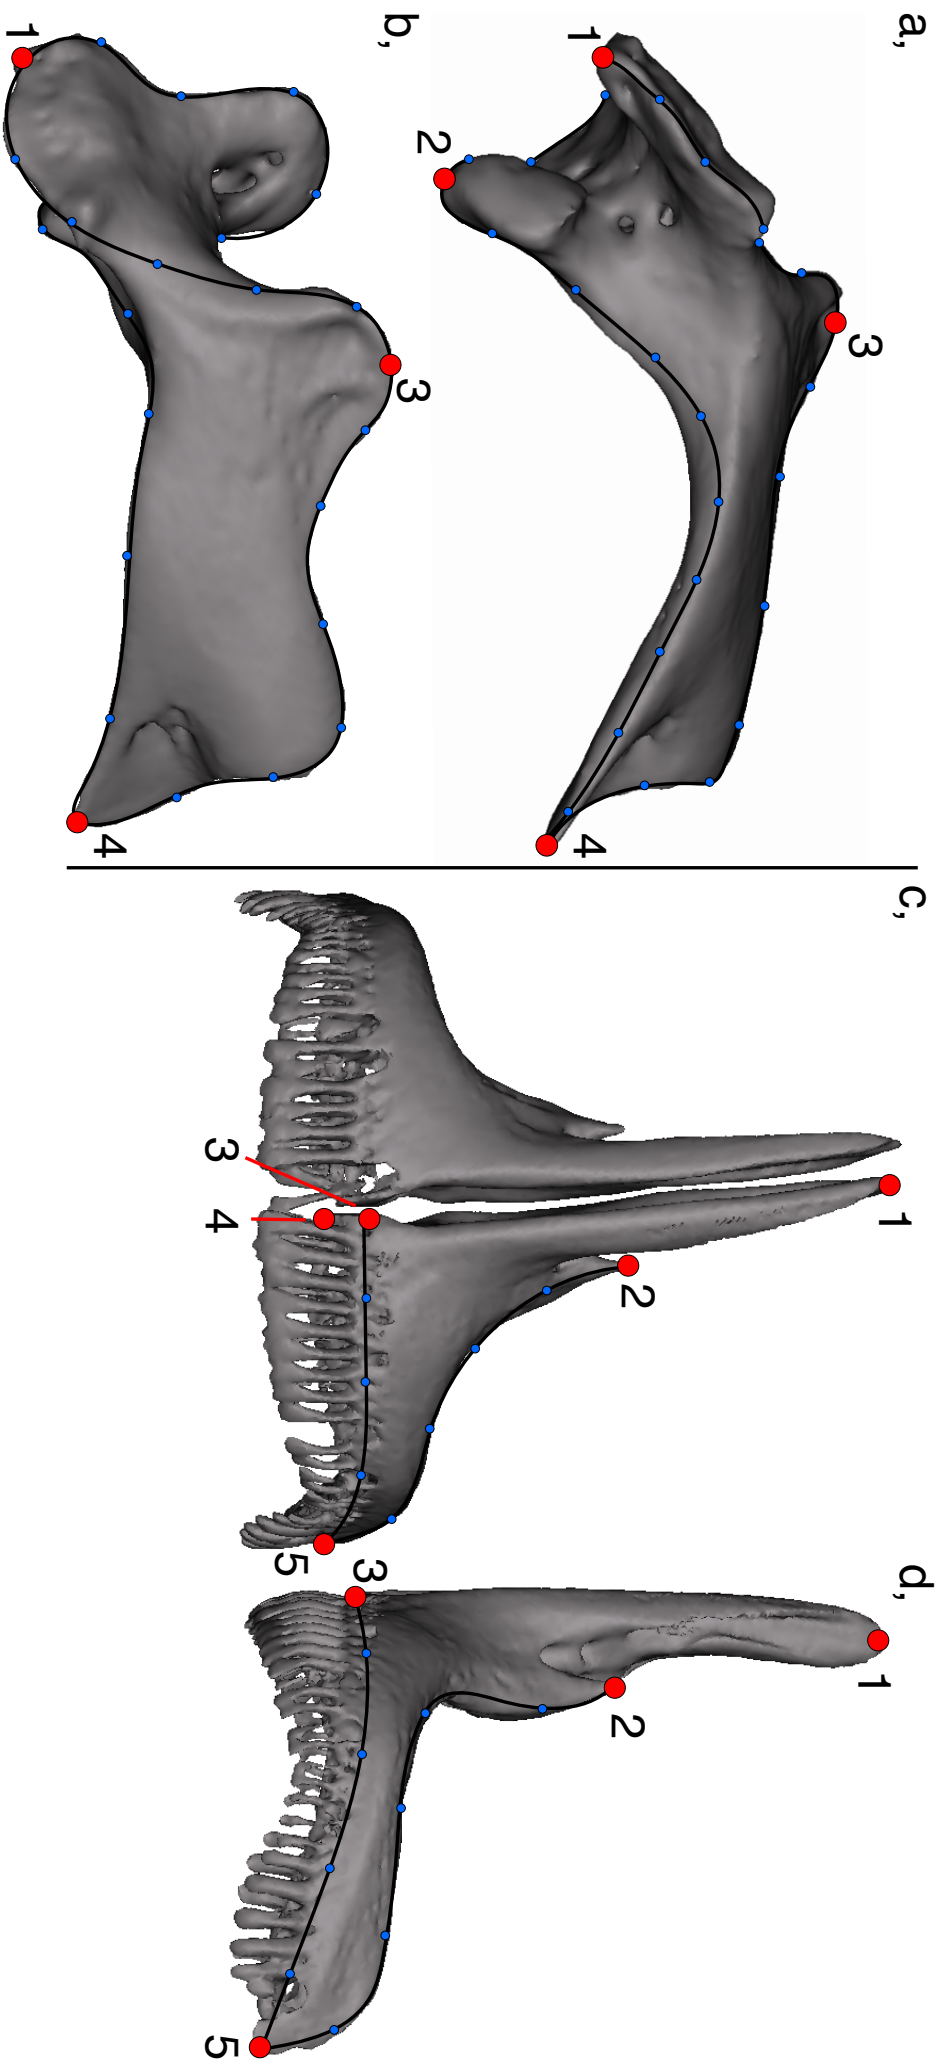

# Figure S3. Natural Population Morphospaces

## a, Maxilla - Individuals

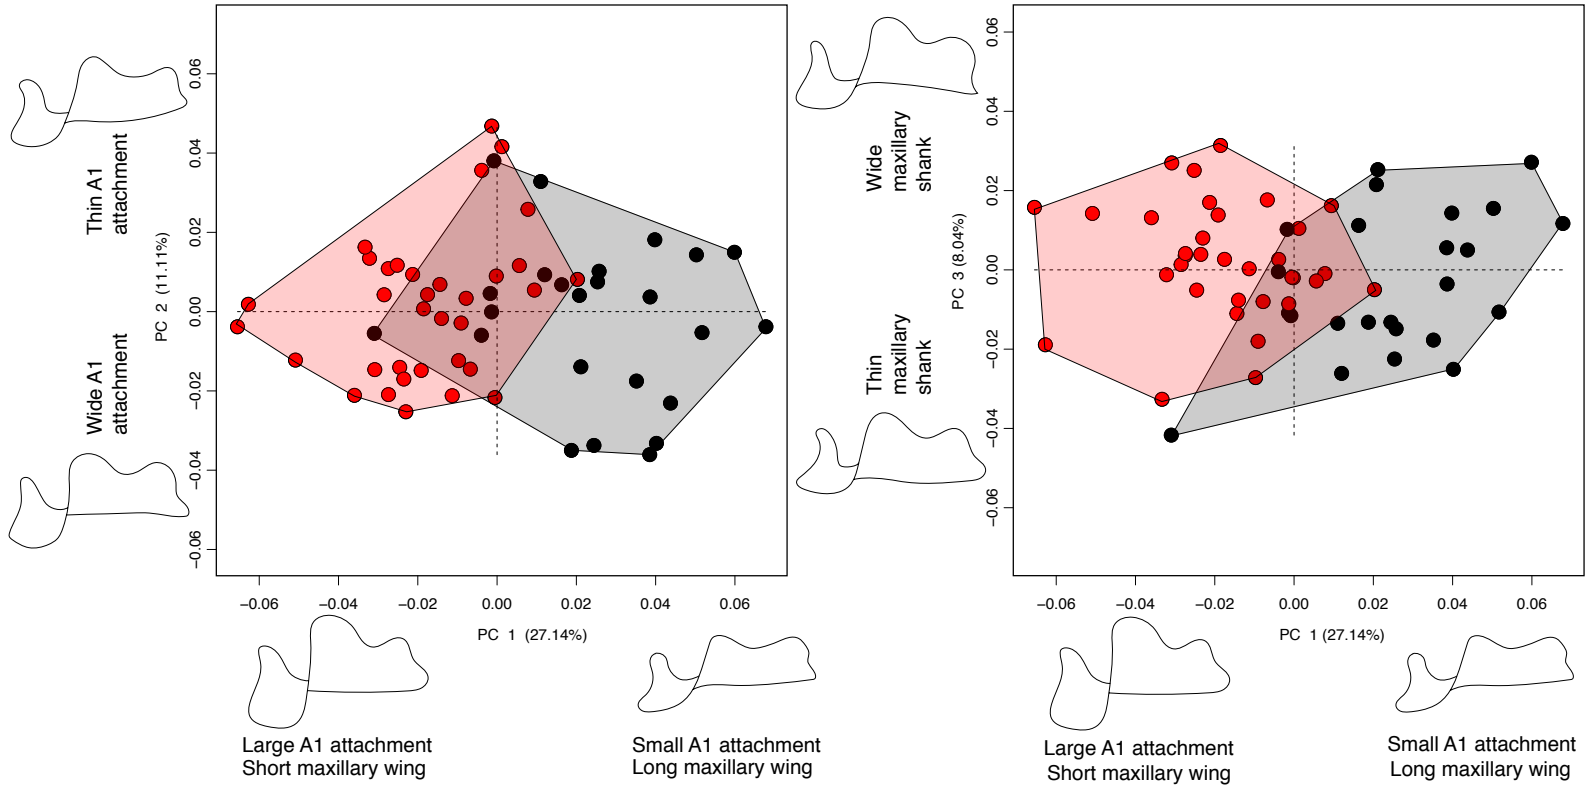

## b, Pre-maxilla - Individuals

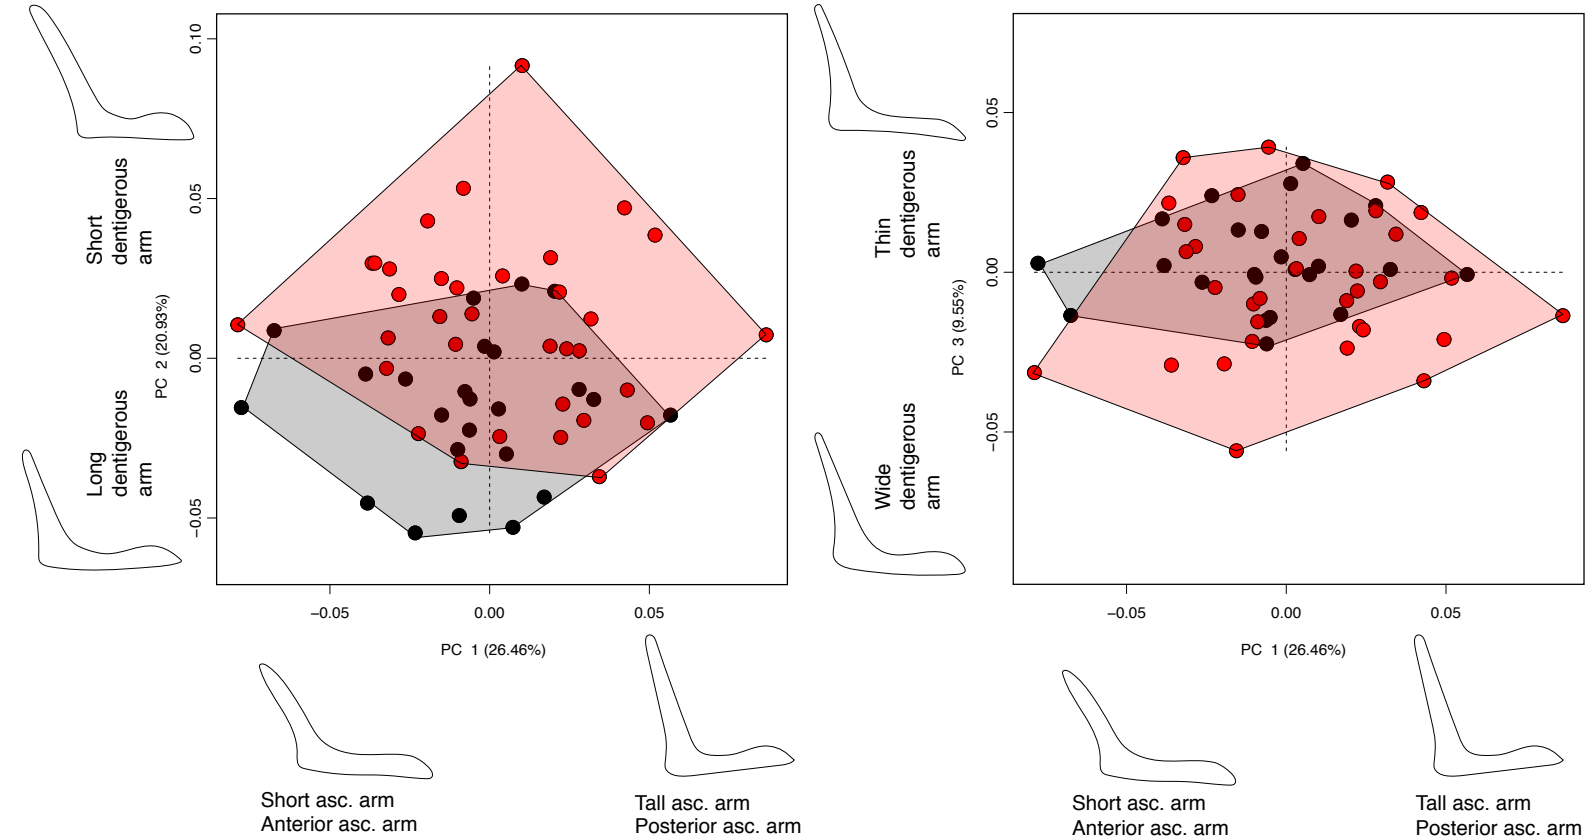

**Figure S4. Schematics of Competing Modularity Models**

**a, Maxilla**

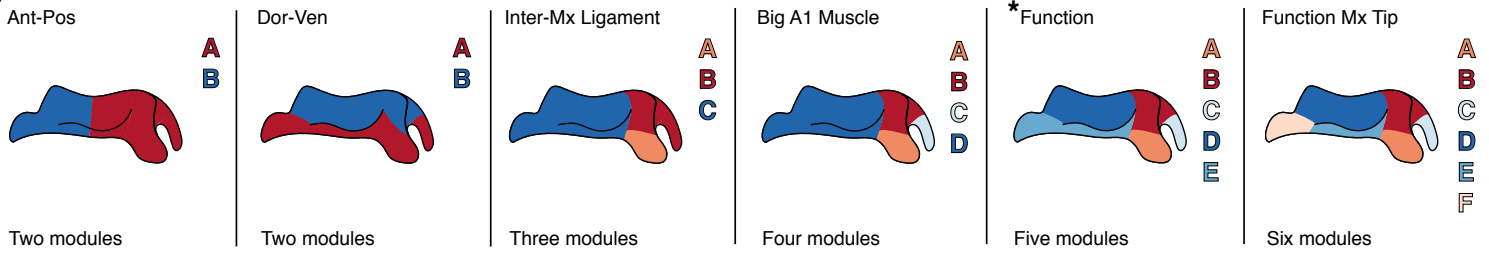

**b, Pre-Maxilla**

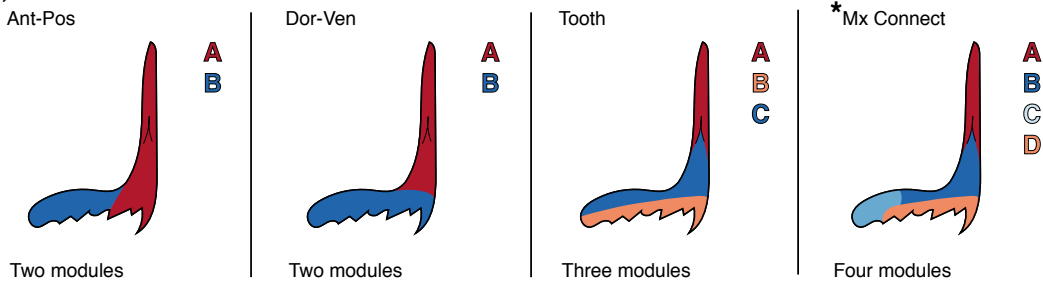

**Figure S5. Maxilla**

a, Rates of morphological evolution

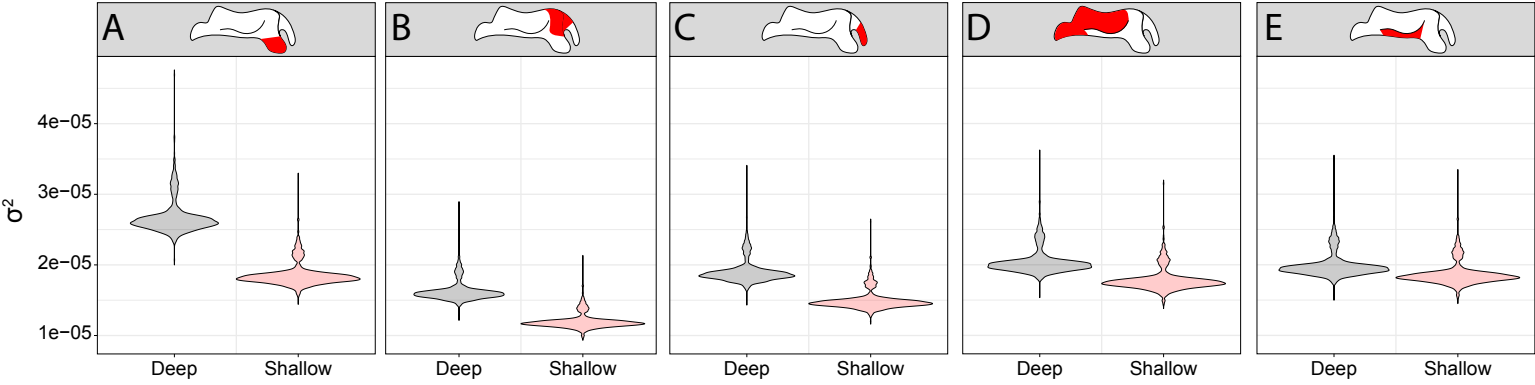

b, Disparity

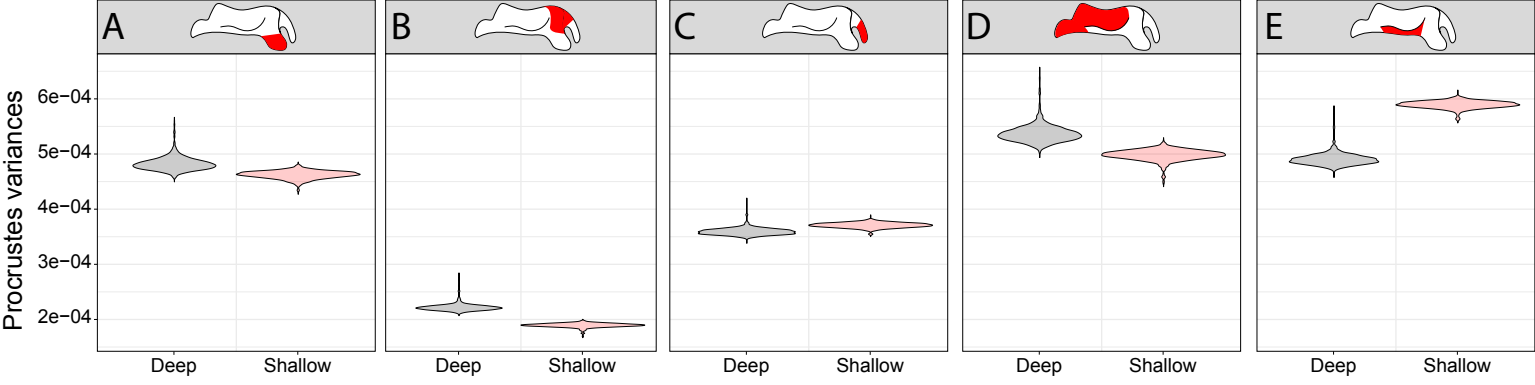

c, Integration

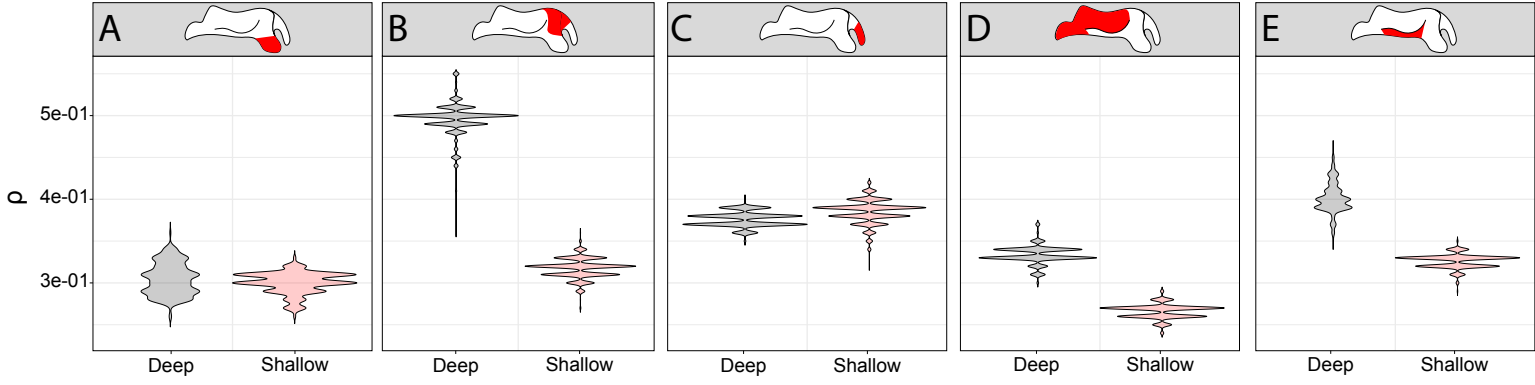

### Figure S5. Pre-maxilla

d, Rates of morphological evolution

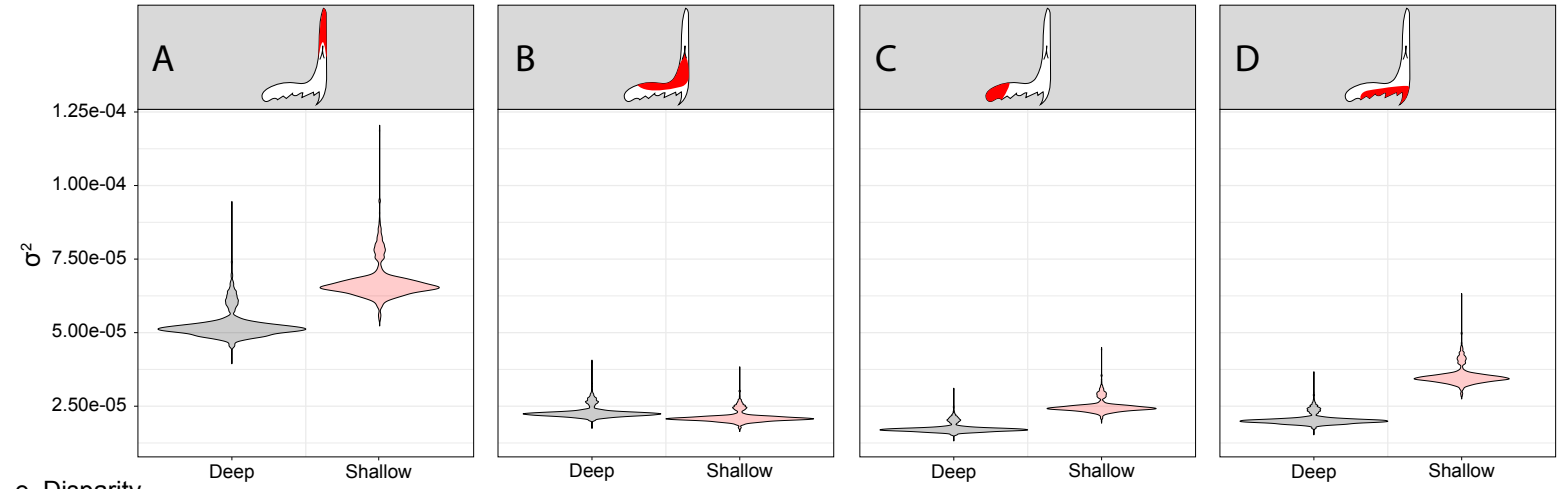

e, Disparity

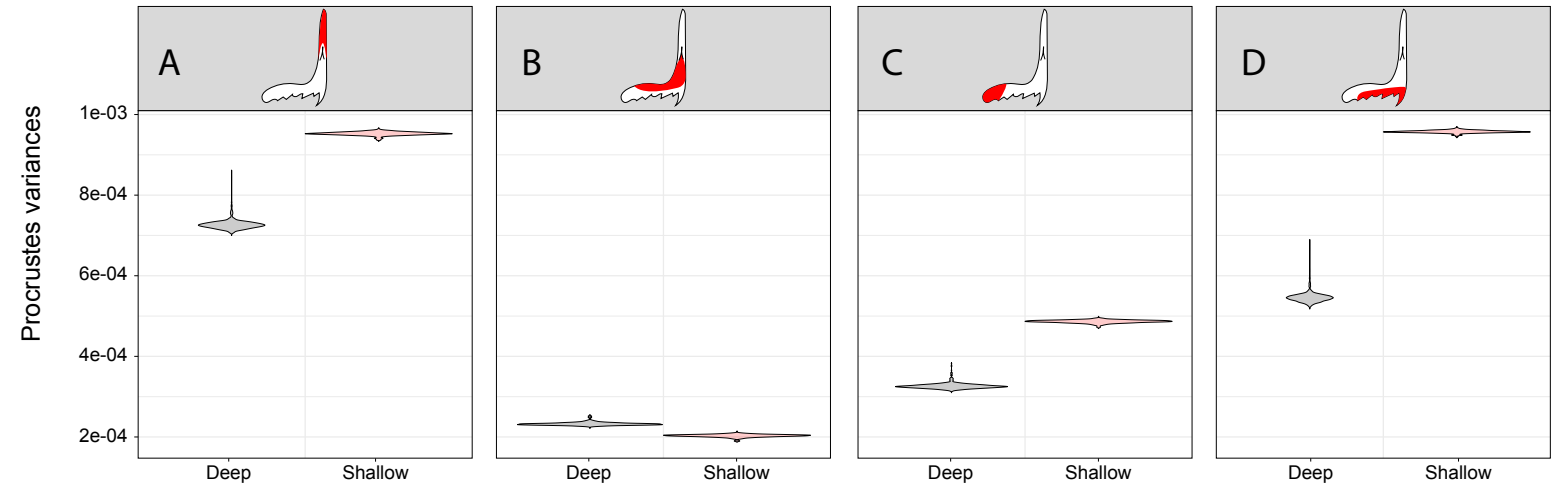

f, Integration

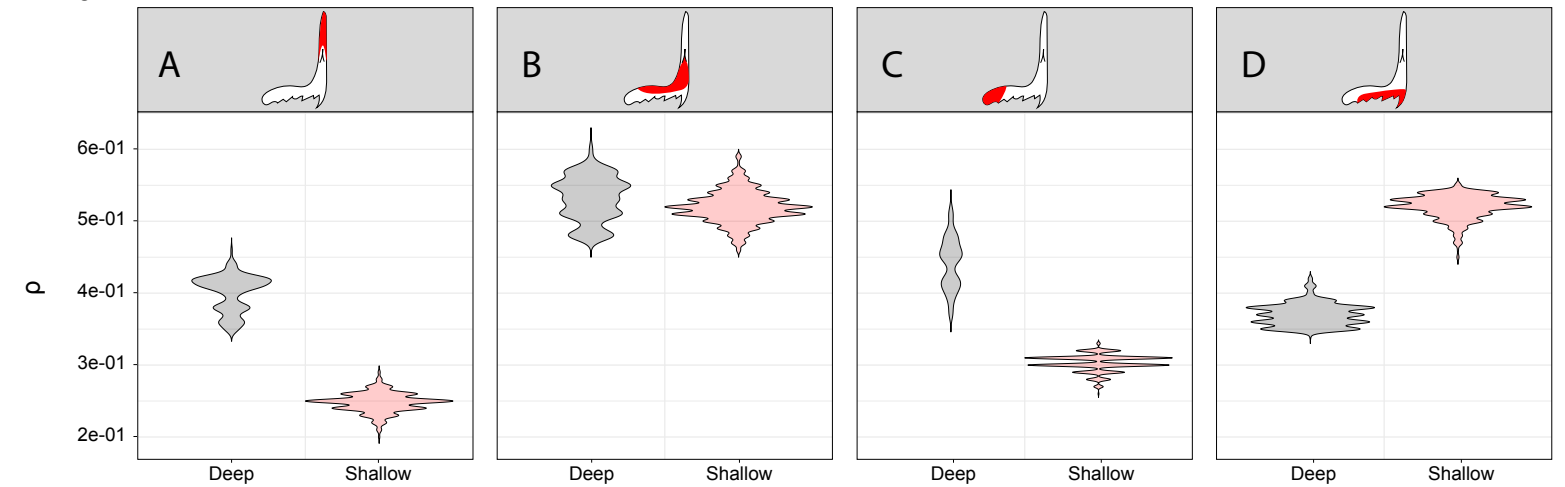

**Figure S6: Selection Frequency of Competing Modularity Models**  
**a, Maxilla**

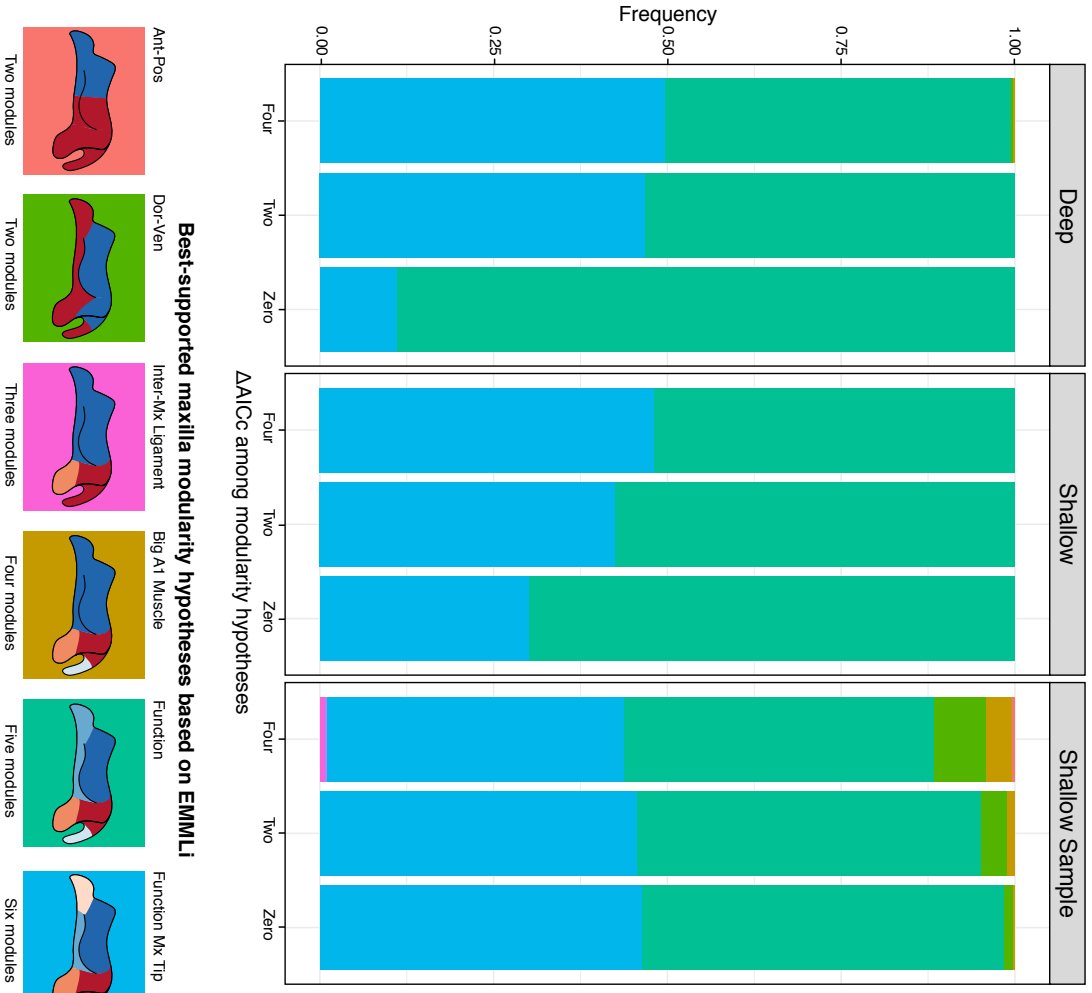

**b, Pre-maxilla**

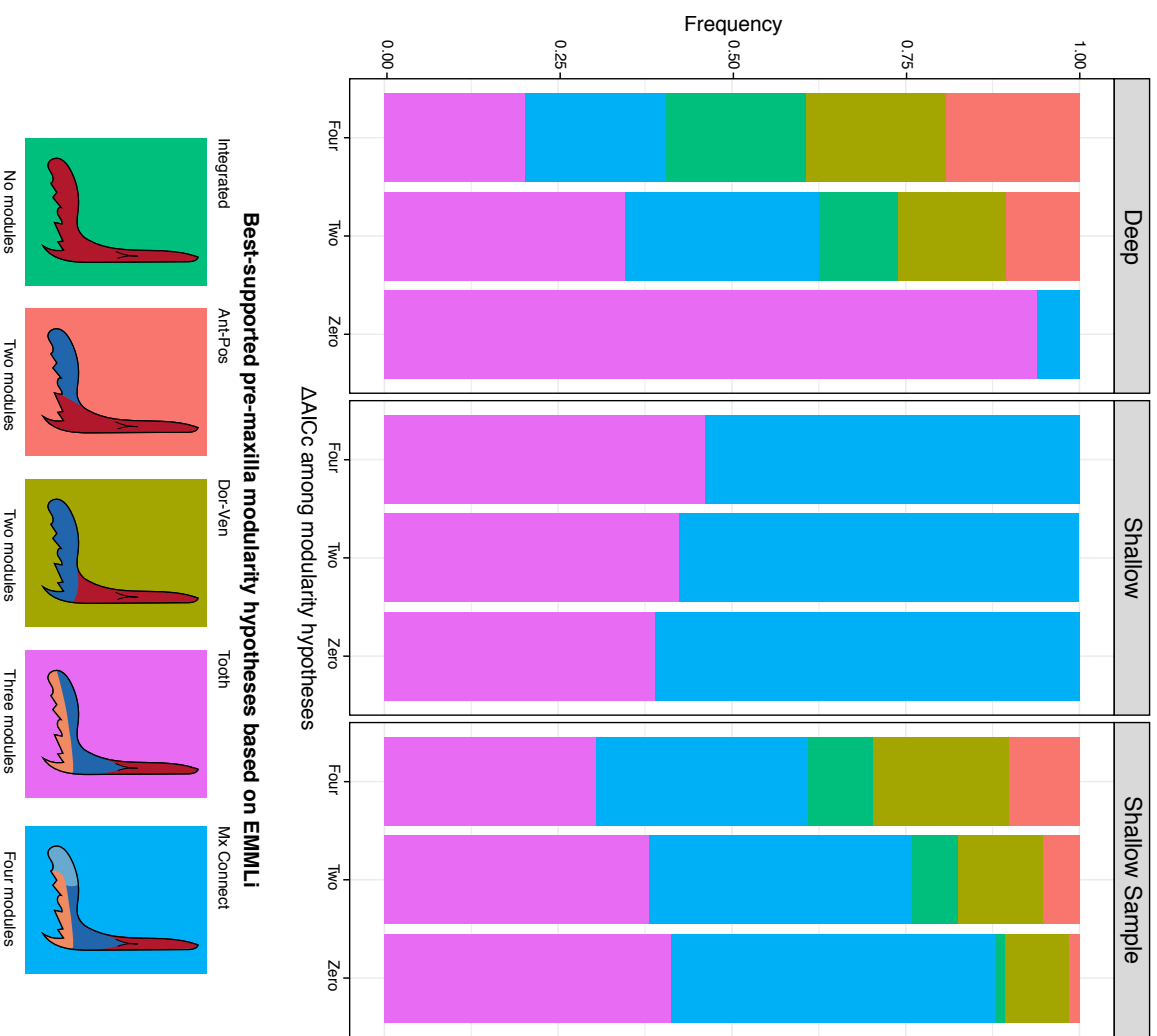

# Figure S7. Experimental Morphospaces

## a, Maxilla - Experimental

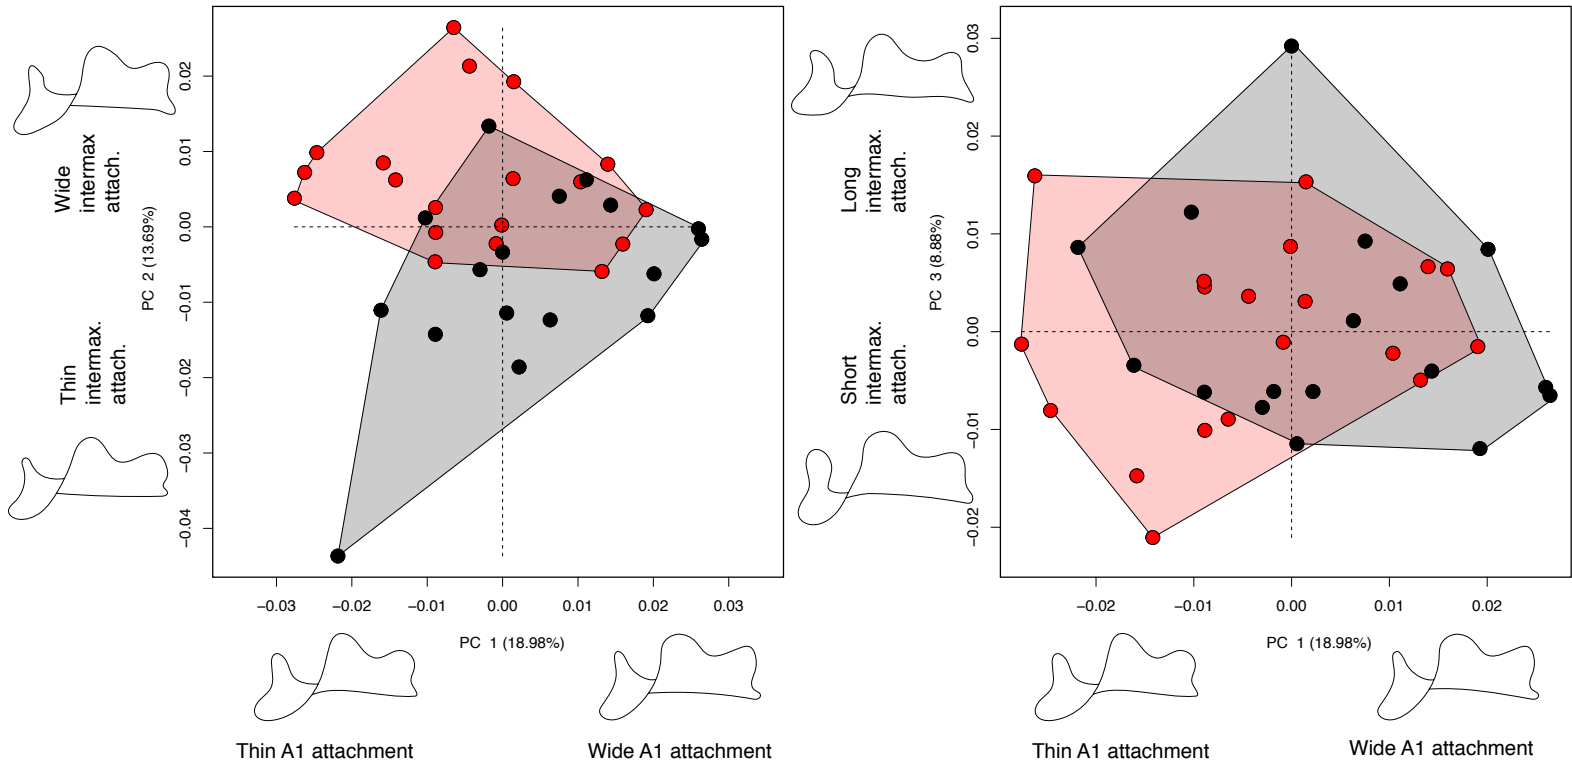

## b, Pre-maxilla - Experimental

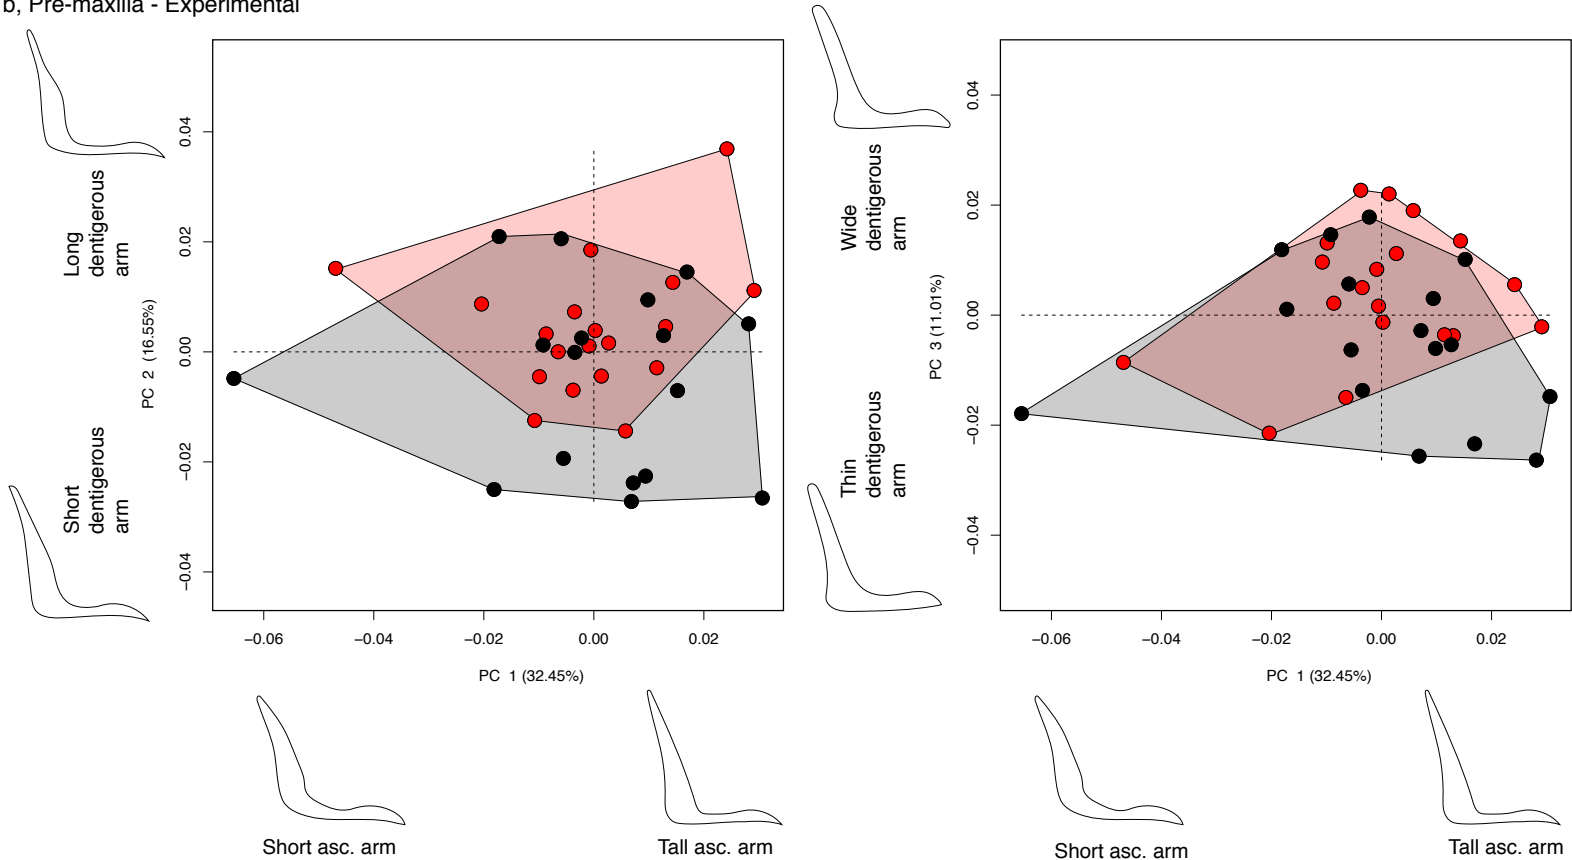

Supplement: 12862_2020_1648_MOESM1_ESM.pdf [file 12862_2020_1648_MOESM1_ESM.pdf]
