# Supplementary material for: Ecomorphological divergence and habitat lability in the context of robust patterns of modularity in the cichlid feeding apparatus
Source: BMC Evol Biol. 2020 Jul 31;20:95. doi: 10.1186/s12862-020-01648-x (PMC7393717; doi:10.1186/s12862-020-01648-x)
Supplement: Supplementary file 2 — Additional file 2. [file 12862_2020_1648_MOESM2_ESM.xlsx]

## Sheet: TableS1
Species	FigureS1_PhyloID	Site	Sample
Tropheus duboisi	aTrduNA000001	Otter Point	1
Tropheus duboisi	aTrduNA000002	Otter Point	2
Metriaclima aurora	aMeauOP010025	Otter Point	25
Metriaclima aurora	aMeauOP010026	Otter Point	26
Metriaclima aurora	aMeauOP010027	Otter Point	27
Melanochromis auratus	aMelaurTWI01069	Otter Point	69
Melanochromis auratus	aMelaurTWI01070	Otter Point	70
Pseudotropheus tropheops Otter gold	aTrogOI010103	Otter Island	103
Pseudotropheus tropheops Otter gold	aTrbmOI010106	Otter Island	106
Pseudotropheus tropheops Otter gold	aTrbmOI010107	Otter Island	107
Pseudotropheus tropheops Otter gold	aTrbmOI010108	Otter Island	108
Pseudotropheus tropheops gracilior	aTrgrOP010131	Otter Island	131
Pseudotropheus tropheops lilac	aTrliOP010151	Otter Island	151
Pseudotropheus tropheops lilac	aTrliOP010152	Otter Island	152
Pseudotropheus tropheops lilac	aTrliOP010153	Otter Island	153
Pseudotropheus tropheops lilac	aTrliTW010159	Thumbi West	159
Pseudotropheus tropheops red cheek	aTrrcTW010160	Thumbi West	160
Pseudotropheus tropheops red cheek	aTrrcTW010161	Thumbi West	161
Pseudotropheus tropheops red cheek	aTrrcTW010162	Thumbi West	162
Pseudotropheus tropheops intermediate	aTrinTW010174	Thumbi West	174
Pseudotropheus tropheops intermediate	aTrinTW010175	Thumbi West	175
Pseudotropheus tropheops intermediate	aTrinTW010176	Thumbi West	176
Pseudotropheus tropheops intermediate	aTrinOI010197	South-side Otter Is.	197
Lethrinops lethrinus	aLeleCB010205	Chembe beach	205
Lethrinops lethrinus	aLeleCB010206	Chembe beach	206
Cynotilapia afra	aCyaafrCH010245	Otter Island	245
Cynotilapia afra	aCyaafrCH010246	Otter Island	246
Psuedotropheus tropheops intermediate	aTrinOI010301	Otter Island Southside 30-35ft	301
Psuedotropheus tropheops intermediate	aTrinOI010302	Otter Island Southside 30-35ft	302
Psuedotropheus tropheops orange chest	aTrocTW010303	Thumbi West 25ft	303
Psuedotropheus tropheops orange chest	aTrocTW010304	Thumbi West 25ft	304
Psuedotropheus tropheops orange chest	aTrocTW010305	Thumbi West 25ft	305
Psuedotropheus tropheops gracilor	aTrgrOP010310	Otter Island	310
Psuedotropheus tropheops microstoma	aTrmiOP010313	Otter Island	313
Psuedotropheus tropheops microstoma	aTrmiOP010314	Otter Island	314
Psuedotropheus tropheops Otter Gold	aTrogOI010317	Otter Island	317
Psuedotropheus tropheops Otter Gold	aTrogOI010318	Otter Island	318
Psuedotropheus tropheops orange chest	aTrocOI010319	Otter Island	319
Psuedotropheus tropheops orange chest	aTrocOI010320	Otter Island	320
Psuedotropheus tropheops orange chest	aTrocOI010321	Otter Island	321
Psuedotropheus tropheops microstoma	aTrmiOP010322	Otter Island	322
Psuedotropheus tropheops gracilor	aTrgrOP010323	Otter Island	323
Psuedotropheus tropheops #5	aTrnfOI010324	Otter Island	324
Psuedotropheus tropheops #5	aTrnfOI010325	Otter Island	325
Psuedotropheus tropheops Chinyamwezi	aTrcwCW010326	Chinyamwezi	326
Psuedotropheus tropheops Chinyamwezi	aTrcwCW010327	Chinyamwezi	327
Psuedotropheus tropheops Chinyamwezi	aTrcwCW010328	Chinyamwezi	328
Psuedotropheus tropheops Chinyamkwazi	aTrckCK010349	Chinyamkwazi	349
Psuedotropheus tropheops Chinyamkwazi	aTrckCK010350	Chinyamkwazi	350
Psuedotropheus tropheops Chinyamkwazi	aTrckCK010351	Chinyamkwazi	351
Petrotilapia sp	aTrbdER0100369	Eccles Reef	369
Petrotilapia sp	aTrbdER0100371	Eccles Reef	371
Psuedotropheus tropheops gold	aTregER010372	Eccles Reef	372
Psuedotropheus tropheops gold	aTregER010373	Eccles Reef	373
Psuedotropheus tropheops gold	aTregER010374	Eccles Reef	374
Psuedotropheus tropheops orange chest	aTrocER010375	Eccles Reef	375
Psuedotropheus tropheops orange chest	aTrocER010376	Eccles Reef	376
Psuedotropheus tropheops orange chest	aTrocER010377	Eccles Reef	377
Psuedotropheus tropheops gold chest	aTrgcCH010381	Chofu Bay	381
Psuedotropheus tropheops gold chest	aTrgcCH010382	Chofu Bay	382
Psuedotropheus tropheops gold chest	aTrgcCH010383	Chofu Bay	383
Psuedotropheus tropheops blk dorsal	aTrbdCH010391	Chofu Bay	391
Psuedotropheus tropheops blk dorsal	aTrbdCH010392	Chofu Bay	392
Psuedotropheus tropheops blk dorsal	aTrbdCH010393	Chofu Bay	393
Psuedotropheus tropheops blk dorsal	aTrbdNM010396	Nanthumbi	396
Psuedotropheus tropheops blk dorsal	aTrbdNM010397	Nanthumbi	397
Psuedotropheus tropheops blk dorsal	aTrwdNM010398	Nanthumbi	398
Psuedotropheus tropheops wht dorsal	aTrwdNM010399	Nanthumbi	399
Psuedotropheus tropheops wht dorsal	aTrwdNM010400	Nanthumbi	400
Cynotilapia afra	aCyaafrCH010681	Chofu Bay	681
Psuedotropheus tropheops	aTrbdNM010795	Nanthumbi	795
Psuedotropheus tropheops	aTrmkMK010892	Makanjila Point	892
Psuedotropheus tropheops	aTrmkMK010893	Makanjila Point	893
Psuedotropheus tropheops	aTrmkMK010894	Makanjila Point	894
Psuedotropheus tropheops	aTrbdWR011004	West Reef	1004
Psuedotropheus tropheops	aTrbdWR011005	West Reef	1005
Psuedotropheus tropheops	aTrbdWR011006	West Reef	1006
Psuedotropheus tropheops	aTrziZR011115	Zimbawe Rock	1115
Pseudotropheus tropheops microstoma	aTrmiDI011379	Domwe (near the Gap)	1379
Pseudotropheus tropheops microstoma	aTrmiDI011382	Domwe (near the Gap)	1382
Pseudotropheus tropheops gracillior	aTrgrDI011384	Domwe (near the Gap)	1384
Pseudotropheus tropheops gracillior	aTrgrDI011385	Domwe (near the Gap)	1385
Pseudotropheus tropheops gracillior	aTrgrDI011386	Domwe (near the Gap)	1386
Metriaclima zebra	aMezeDI011410	Domwe (near the Gap)	1410
Metriaclima zebra	aMezeDI011411	Domwe (near the Gap)	1411
Metriaclima zebra	aMezeDI011412	Domwe (near the Gap)	1412
Pseudotropheus tropheops	aTrbdMU011494	Mumbo Island Site B (Ribbink)	1494
Pseudotropheus tropheops	aTrbdMU011495	Mumbo Island Site B (Ribbink)	1495
Pseudotropheus tropheops	aTrbdMU011496	Mumbo Island Site B (Ribbink)	1496
Pseudotropheus tropheops	aTrliMU011499	Mumbo Island Site B (Ribbink)	1499
Pseudotropheus tropheops	aTrliMU011500	Mumbo Island Site B (Ribbink)	1500
Pseudotropheus tropheops	aTrliMU011501	Mumbo Island Site B (Ribbink)	1501
Metriaclima zebra	aMezeMU011548	Mumbo Island Site B (Ribbink)	1548
Metriaclima zebra	aMezeMU011549	Mumbo Island Site B (Ribbink)	1549
Metriaclima zebra	aMezeMU011550	Mumbo Island Site B (Ribbink)	1550
Metriaclima barlowi	aMebaMZ011591	Mazinzi Reef	1591
Metriaclima barlowi	aMebaMZ011592	Mazinzi Reef	1592
Metriaclima barlowi	aMebaMZ011593	Mazinzi Reef	1593
Psuedotropheus tropheops	aTrbbMZ011594	Mazinzi Reef	1594
Psuedotropheus tropheops	aTrbbMZ011595	Mazinzi Reef	1595
Psuedotropheus tropheops	aTrbbMZ011596	Mazinzi Reef	1596
Psuedotropheus tropheops BB	aTrbzMZ011597	Mazinzi Reef	1597
Psuedotropheus tropheops BB	aTrbzMZ011598	Mazinzi Reef	1598
Psuedotropheus tropheops BB	aTrbzMZ011599	Mazinzi Reef	1599
Metriaclima benetos	aMebeMZ011603	Mazinzi Reef	1603
Metriaclima benetos	aMebeMZ011604	Mazinzi Reef	1604
Metriaclima zebra	aMebeMZ011605	Mazinzi Reef	1605
Metriaclima zebra	aMezeMZ011614	Mazinzi Reef	1614
Metriaclima zebra	aMezeMZ011615	Mazinzi Reef	1615
Metriaclima zebra	aMezeMZ011618	Mazinzi Reef	1618
Psuedotropheus tropheops intermediate	aTrinMZ011645	Mazinzi Reef	1645
Psuedotropheus tropheops intermediate	aTrinMZ011646	Mazinzi Reef	1646
Psuedotropheus tropheops intermediate	aTrinMZ011647	Mazinzi Reef	1647
Psuedotropheus tropheops lilac Mazinzi	aTrliMZ011656	Mazinzi Reef	1656
Psuedotropheus tropheops zebra	aTrmzMU011753	Mumbo Island Site B	1753
Psuedotropheus tropheops zebra	aTrmzMU011754	Mumbo Island Site B	1754
Psuedotropheus tropheops Mumbo	aTrmuMU011755	Mumbo Island Site B	1755
Psuedotropheus tropheops Mumbo	aTrmuMU011756	Mumbo Island Site B	1756
Pseudotropheus tropheops lilac	aTrliTw011790	Thumbi West (Cove) RCA	1790
Copidochromis borleyi	aCoboOP011819	Otter point	1819
Copidochromis borleyi	aCoboOP011820	Otter point	1820
Copidochromis borleyi	aCoboOP011834	Otter Island	1834
Maravichromis mola	aMamoOC011836	Otter Island	1836
Maravichromis mola	aMamoOC011837	Otter Island	1837
Rhamphochromis sp	aRhspNA011854	Otter Island	1854
Rhamphochromis sp	aRhspRP011854	Otter Island	1854
Rhamphochromis sp	aRhspNA011857	Otter Island	1857
Rhamphochromis sp	aRhspRP011857	Otter Island	1857
Rhamphochromis sp	aRhspNA011858	Otter Island	1858
Rhamphochromis sp	aRhspRP011858	Otter Island	1858
Lethrinops deep	aLedeCB011900	Chembe Beach (near Mckaye's old place)	1900
Lethrinops deep	aLedeCB011901	Chembe Beach (near Mckaye's old place)	1901
Lethrinops deep	aLedeCB011902	Chembe Beach (near Mckaye's old place)	1902
Lethrinops lethrinus	aLeleCB011917	Otter Point	1917
Maravochromis Mola	aMamoOC011948	Otter Point	1948
Promelas rock sp	aPrrdOC013131	Outer Channel	3131
Promelas rock sp	aPrrdOC013132	Outer Channel	3132
Promelas rock sp	aPrrdOC013134	Outer Channel	3134

## Sheet: TableS2
Species	Locality	LocalityName	SpeciesLocID	Depth	SpecimenID	ManPC1	ManPC2	ManPC3	ManPC4	ManPC5	PJPC1	PJPC2	PJPC3	PJPC4	PJPC5	MxPC1	MxPC2	MxPC3	MxPC4	MxPC5	PMPC1	PMPC2	PMPC3	PMPC4	PMPC5
Tropheops_black_dorsal	CH	Chiofu Bay	Tropheops_black_dorsal-CH	S	TrbdCH010385	-0.0661275	0.012393	-0.0145711	0.0471179	0.0142557	-0.0136266	-0.0132801	-0.0082624	0.00237903	-0.0012717	-0.014014	-0.00172984	-0.00764327	-0.0188989	0.00717666	-0.0055268	0.013894	0.0391745	-0.00718183	0.0087426
Tropheops_black_dorsal	CH	Chiofu Bay	Tropheops_black_dorsal-CH	S	TrbdCH010386	-0.0428607	-0.0085064	0.00396758	-0.00753161	0.00806563	-0.013749	-0.0253836	-0.00143449	-0.0116443	-0.00491099	-0.00387538	0.0356435	0.00263579	-0.00871574	-0.0206726	-0.00998914	-0.0285704	-0.000696814	0.0113052	-0.026174
Tropheops_black_dorsal	CH	Chiofu Bay	Tropheops_black_dorsal-CH	S	TrbdCH010388	-0.0381629	-0.00200762	-0.0152549	0.00128469	0.00462631	-0.0313334	-0.0305001	0.000511102	-0.01322	-0.0106444	-0.0654929	-0.0038242	0.0157691	-0.016999	-0.0344133	-0.0367667	0.0297576	0.0216524	-0.00824655	-0.0424365
Tropheops_black_dorsal	MU	Mumbo Island	Tropheops_black_dorsal-MU	D	TrbdMU010001	-0.0350931	5.07e-05	-0.0186218	-0.00522225	-0.0182285	-0.0241344	-0.0237124	-9.57e-05	-0.0124338	-0.00872344	-0.0308574	-0.0146304	0.0269795	-0.0210356	0.00274487	-0.01941	0.042989	-0.0286775	0.0114235	0.00161821
Tropheops_black_dorsal	MU	Mumbo Island	Tropheops_black_dorsal-MU	D	TrbdMU010002	-0.0317685	-0.0212405	0.0189765	0.00309509	-0.00720179	-0.00571963	0.00366809	-0.00274771	-0.00231318	0.0244075	0.00779263	0.0258129	-0.00094175	-0.0114361	0.0320434	0.0430942	-0.00994986	-0.0339752	-0.00237688	-0.00189122
Tropheops_black_dorsal	MU	Mumbo Island	Tropheops_black_dorsal-MU	D	TrbdMU010005	-0.0297549	0.000225616	-0.00621326	0.00245432	0.023174	-0.0222617	-0.014183	-0.00441988	-0.0148262	6.08e-05	-0.0508637	-0.0122225	0.0142343	-0.00875796	0.0050808	0.0101946	0.0916273	0.0174167	0.0099591	-0.00384049
Tropheops_broadmouth	OI	Otter Island	Tropheops_broadmouth-OI	D	TrbmOI010106	-0.0295533	-0.00764473	-0.0101339	-0.0261008	-0.0060079	-0.042822	-0.00136887	-0.0115796	-0.00266713	0.00418301	0.00940817	0.00542951	0.0161993	0.00919554	-0.00603905	0.0493984	-0.0201983	-0.0210362	0.00596326	0.00936173
Tropheops_broadmouth	OI	Otter Island	Tropheops_broadmouth-OI	D	TrbmOI010107	-0.0279604	0.0193325	-0.00305059	-0.0268246	0.0159323	-0.0334994	-0.0155391	0.0109202	0.0073012	-0.00392347	-0.0627383	0.00184899	-0.0188931	0.00423113	-0.00670285	-0.015107	0.0249484	0.0243136	-0.0160557	0.00485716
Tropheops_broadmouth	OI	Otter Island	Tropheops_broadmouth-OI	D	TrbmOI010108	-0.0279151	0.0111366	-0.0105458	0.0077417	-0.000781001	NA	NA	NA	NA	NA	-0.0359861	-0.0211141	0.0131534	-0.00500926	0.0151032	-0.0106511	0.00437334	-0.0216431	0.0198025	-0.0111538
Tropheops_chinyamwezi	CW	Chinyamwezi	Tropheops_chinyamwezi-CW	S	TrcwCW010335	-0.0276628	-0.00763065	0.0218657	-0.00247988	0.00226463	-0.0270596	-0.00816171	0.00040731	0.00276541	0.014435	-0.0274013	-0.0209335	0.00411377	0.00145293	0.00403073	0.0294817	-0.0194428	-0.00297348	0.00054492	-0.031862
Tropheops_chinyamwezi	CW	Chinyamwezi	Tropheops_chinyamwezi-CW	S	TrcwCW010348	-0.0259158	0.000917727	0.0209689	-0.00787448	0.0176899	-0.0149783	-0.00259992	0.00115434	0.00912133	-0.0127698	-0.00907202	-0.00287506	-0.0180119	0.00272481	-0.00715916	0.0222514	-0.024767	-0.00585093	-0.00892914	-0.0217641
Tropheops_chinyamwezi	CW	Chinyamwezi	Tropheops_chinyamwezi-CW	S	TrcwCW010336	-0.0251746	0.00768616	0.0243956	0.0137872	-0.010664	-0.0168762	0.00324695	-0.00727362	0.00808599	0.0143521	0.0202778	0.00813594	-0.00500031	-0.0185517	0.0281787	0.0343402	-0.0370763	0.0119328	-0.00958553	-0.00669487
Tropheops_chinyankwazi	CK	Chinyankwazi	Tropheops_chinyankwazi-CK	S	TrckCK010357	-0.0247404	0.0117239	-0.00340025	0.00673917	-0.00240889	-0.0243635	0.00267784	0.0313305	0.00472859	-0.026119	-0.0175428	0.00429194	0.00265635	-0.0163066	-0.00604261	-0.0223031	-0.0235945	-0.00478221	0.0295567	-0.0304553
Tropheops_chinyankwazi	CK	Chinyankwazi	Tropheops_chinyankwazi-CK	S	TrckCK010358	-0.0238485	-0.0346157	-0.00211181	0.00465095	-0.0223277	-0.0163769	0.018787	0.0113064	0.0245354	0.0115834	-0.00970481	-0.0123601	-0.0271807	0.00066037	-0.000356461	-0.0322752	-0.0031654	0.0358768	-0.0341513	-0.00903253
Tropheops_chinyankwazi	CK	Chinyankwazi	Tropheops_chinyankwazi-CK	S	TrckCK010362	-0.0224925	0.00199922	0.0297558	-0.00922068	-0.00273554	-0.0255101	0.00635671	-0.00061524	0.0210111	0.0279328	-0.028493	0.00425679	0.00133748	0.0416383	0.00858678	0.021853	0.0207229	0.000358866	-0.0387922	-0.00304091
Tropheops_gold_chest	CH	Chiofu Bay	Tropheops_gold_chest-CH	S	TrgcCH010381	-0.0205514	-0.0452077	0.00819336	0.00585824	-0.0116844	0.00724849	0.0275691	-0.0153038	-0.00693392	-0.00810699	-0.0067485	-0.0145081	0.0176437	-0.00116025	0.00810249	0.00404691	0.0257758	0.0105556	0.00560015	0.0203796
Tropheops_gold_chest	CH	Chiofu Bay	Tropheops_gold_chest-CH	S	TrgcCH010383	-0.0200732	-0.0360105	-0.00995004	-0.00602256	0.00652358	-0.0480252	0.0193397	-0.00130889	-0.0155225	0.0078518	-0.0235263	-0.0170049	0.0039034	-0.0103536	-0.00646676	-0.0788505	0.0104829	-0.0314222	-0.0155367	-0.013688
Tropheops_gold_chest	CH	Chiofu Bay	Tropheops_gold_chest-CH	S	TrgcCH010384	-0.0164357	-0.0251575	0.023991	0.00193773	0.00532961	0.0128684	0.0347369	-0.0159154	-0.0179319	0.0108254	-0.0113211	-0.0212075	0.000282757	-0.00638767	0.00924164	-0.0313207	0.0279547	0.00644825	-0.0106811	-0.0069434
Tropheops_gold	ER	Eccles Reef	Tropheops_gold-ER	S	TregER010372	-0.0158744	0.0417169	-0.0178121	-0.00175759	0.000732691	0.00508046	0.000817253	0.00775129	0.0141696	-0.00300065	0.00121384	0.0416104	0.0104697	-0.00523563	-0.00155936	0.0317159	0.0123097	0.0282287	-0.00812959	-0.0198753
Tropheops_gold	ER	Eccles Reef	Tropheops_gold-ER	S	TregER010374	-0.0155841	0.0401966	0.0049015	0.0152581	0.00202863	NA	NA	NA	NA	NA	-0.0213002	0.00937536	0.0170137	0.0333058	0.0294059	0.0190772	0.0314787	-0.0237502	-0.0117881	0.000324251
Tropheops_gracilior	DI	Domwe Island	Tropheops_gracilior-DI	D	TrgrDI010008	-0.0147405	-0.0143942	-0.00604637	0.0197113	0.0154468	-0.0298983	0.0294826	-0.0227546	0.0100192	-0.00824579	-0.000200768	0.00897064	-0.00199226	-0.0202236	0.0145064	0.0865887	0.00732813	-0.0135954	0.0192593	-0.00821541
Tropheops_gracilior	DI	Domwe Island	Tropheops_gracilior-DI	D	TrgrDI010010	-0.014402	0.0147854	-0.00251347	-0.0177825	-0.0226713	-0.0529422	-0.017431	-0.0226059	-0.0145023	-0.000647488	-0.00053629	-0.0216731	-0.00186507	0.00655322	0.0194023	-0.0155968	0.0130452	-0.05588	0.0062757	-0.00435447
Tropheops_gracilior	DI	Domwe Island	Tropheops_gracilior-DI	D	TrgrDI010027	-0.0133199	-0.00613269	0.00481321	-0.0139007	0.0384689	0.00232593	0.0131034	-0.000111567	-0.0343528	-0.0139616	-0.0333028	0.016261	-0.0326448	-0.00263804	-0.00739385	0.00316142	-0.0245152	0.00112455	-0.000760005	-0.00528574
Tropheops_gracilior	OP	Otter Point	Tropheops_gracilior-OP	D	TrgrOI010109	-0.0108596	-0.0221366	-0.0130059	0.00639366	-0.00578756	-0.00467829	0.0167312	-0.0114629	-0.0066224	-0.0063135	0.00561218	0.0116144	-0.00280633	-0.013425	-0.000881141	-0.0102654	0.0220401	-0.00992138	0.00930745	-0.0169058
Tropheops_gracilior	OP	Otter Point	Tropheops_gracilior-OP	D	TrgrOI010124	-0.0106177	0.00422592	-0.011563	-0.0397917	0.0130592	-0.0149448	-0.0196902	0.0161424	0.0210318	0.0159723	-0.000808336	0.0380448	-0.0115548	0.0259208	0.00496383	0.0203729	0.0209696	0.0163316	-0.00671892	0.00306009
Tropheops_gracilior	OP	Otter Point	Tropheops_gracilior-OP	D	TrgrOI010131	-0.0063021	0.0166049	0.0165206	-0.0165699	0.00807174	-0.000171192	0.0054429	0.00763479	-0.00261421	0.000185391	-0.0251942	0.0116986	0.0250966	0.0150943	0.0137681	0.0241066	0.00295787	-0.0180274	0.013103	-0.00870462
Tropheops_intermediate	MZ	Mazinzi Reef	Tropheops_intermediate-MZ	D	TrinMZ011646	-0.0062608	0.00888885	0.0347706	0.017766	0.00794328	0.0110867	0.00334747	-0.00892211	0.00590164	0.0065715	-0.0245613	-0.014055	-0.0051148	0.0244467	-0.00731513	0.0189191	0.00379406	-0.00889821	-0.0126836	0.00753199
Tropheops_intermediate	MZ	Mazinzi Reef	Tropheops_intermediate-MZ	D	TrinMZ011647	-0.00496274	0.00250924	0.00769359	-0.00145407	-0.0183397	-0.00448667	-0.0189195	-0.0105374	0.0219719	-0.00417376	-0.00173803	0.00457911	0.0102276	0.0170168	-0.00187237	-0.00772961	-0.0104223	0.0127655	0.00593197	0.025225
Tropheops_intermediate	MZ	Mazinzi Reef	Tropheops_intermediate-MZ	D	TrinMZ011645	-0.00493935	0.00927213	-0.000621992	-0.0145127	0.00861736	-0.0183565	0.00181719	0.0215179	-0.00302819	-0.0170622	-0.00139146	-7.26e-05	-0.0108617	0.0083647	-0.00848861	0.00729758	-0.0529301	-0.000749544	-0.000193052	-0.0152744
Tropheops_intermediate	OI	Otter Island	Tropheops_intermediate-OI	D	TrinOI010301	-0.0032586	-0.0171905	-0.0123914	0.00200276	-0.0308172	-0.00602397	0.0201497	-0.00587991	0.0058166	-0.00458114	-0.0185381	0.0007083	0.031387	-0.00185554	-0.0192259	-0.035961	0.0297938	-0.029065	-0.0364474	-0.00417695
Tropheops_intermediate	OI	Otter Island	Tropheops_intermediate-OI	D	TrinOI010302	0.00035964	0.0282007	0.0195016	0.0149534	-0.00340193	-0.0304838	0.00204939	0.00892574	0.017676	-0.000310705	-0.0230175	-0.0252657	0.00802524	0.000829605	0.00587869	0.0517846	0.0385525	-0.00183348	-0.00283055	-0.0135406
Tropheops_intermediate	OI	Otter Island	Tropheops_intermediate-OI	D	TrinOI010197	0.000383283	-0.00961788	-0.0393027	-0.0106453	-0.00826795	NA	NA	NA	NA	NA	-0.0274487	0.0108493	0.00359899	0.0125051	0.00638939	-0.0317768	0.00636829	0.0149774	0.0188965	-0.00785201
Tropheops_intermediate	OI	Otter Island	Tropheops_intermediate-OI	D	TrinOI010198	0.000402054	0.012527	-0.00358012	-0.013146	0.00312705	-0.0195631	-0.000345233	0.010531	-0.0153473	0.0088297	-0.00781124	0.00336341	-0.00800492	0.00340921	-0.0119452	0.0280593	0.00235894	0.0192549	-0.0102225	-0.000603927
Tropheops_intermediate	TW	Thumbi West	Tropheops_intermediate-TW	D	TrinTW010172	0.000686197	-0.0170828	0.0167299	-0.0192249	-0.0205379	-0.00198423	0.0382454	0.000747311	0.00786408	-0.0189599	-0.00133286	0.0468079	-0.00856485	0.00832216	-0.000138509	-0.00892655	-0.0323768	-0.0155061	-0.04169	0.00386831
Tropheops_intermediate	TW	Thumbi West	Tropheops_intermediate-TW	D	TrinTW010181	0.00119368	0.0033428	0.0285228	0.0121098	-0.0109626	-0.0154835	-0.00390087	0.00179152	0.00791502	0.0167468	-0.0321782	0.0134545	-0.00123194	0.0221144	-0.00939671	-0.00822059	0.0532111	-0.00818871	-0.00632586	-0.0033328
Tropheops_intermediate	TW	Thumbi West	Tropheops_intermediate-TW	D	TrinTW010184	0.00312997	0.0398941	-0.016066	-0.00841487	0.00253209	NA	NA	NA	NA	NA	-0.0309739	-0.00548227	-0.0416917	-0.00486786	0.00578011	0.0566356	-0.0177945	-0.000699536	-0.0347962	0.0124452
Tropheops_lilac	MU	Mumbo Island	Tropheops_lilac-MU	S	TrliMU010001	0.00472152	-0.00478928	-0.0109331	0.00791986	-0.00491433	NA	NA	NA	NA	NA	0.0110154	0.0328224	-0.0134653	-0.0137075	0.00824614	0.0325779	-0.0128862	0.000884304	-0.0054096	0.00436283
Tropheops_lilac	MU	Mumbo Island	Tropheops_lilac-MU	S	TrliMU010028	0.0090768	0.00336114	-0.00533312	-0.00131915	-0.0291894	-0.0131963	0.00631493	-0.00525814	0.000888619	0.00238816	-0.0144204	0.00685303	-0.0110221	0.00577193	-0.0198184	0.0228996	-0.0143433	-0.0169725	0.00233738	-0.00757854
Tropheops_lilac	MU	Mumbo Island	Tropheops_lilac-MU	S	TrliMU010029	0.0111589	0.0057894	-0.0427252	0.00186241	0.00294094	-0.0241597	-0.00831997	-0.000249805	0.000277086	0.00565902	-0.0191463	-0.0148312	0.0138436	-0.00733169	0.0166356	0.0422044	0.0470766	0.0186918	0.0323072	-0.00326293
Tropheops_lilac	MZ	Mazinzi Reef	Tropheops_lilac-MZ	S	TrliMz011656	0.0131281	0.00888317	0.0325738	-0.026481	-0.0145386	0.0496172	-0.00756477	-0.0170246	0.0237317	-0.00937626	0.0244343	-0.0337469	-0.0132145	-0.0053178	0.00760901	-0.0232981	-0.0546693	0.0239814	0.00255402	-0.0115969
Tropheops_lilac	OP	Otter Point	Tropheops_lilac-OP	S	TrliOP010151	0.0136539	0.0366891	-0.0281332	0.0177964	-0.00583869	0.028069	-0.00609471	0.0396844	0.000470687	0.0142865	0.0253582	0.00751276	-0.0224963	-0.0216145	-0.00243284	-0.0284062	0.0199582	0.0080623	0.0179116	0.0376461
Tropheops_lilac	OP	Otter Point	Tropheops_lilac-OP	S	TrliOP010153	0.0142934	0.0269931	0.0116504	0.0133509	-0.00821459	-0.00158036	-0.00362707	-0.0305286	0.000621365	-0.00830339	0.0257445	0.0101839	-0.0148686	-0.0319435	0.0288196	0.0100859	0.0232392	0.0018901	-0.00107713	0.00590474
Tropheops_lilac	OP	Otter Point	Tropheops_lilac-OP	S	TrliOP010156	0.018328	0.0222329	-0.0167835	0.0103792	-0.0208261	0.0107978	-0.00417397	0.0277509	-0.0139571	0.00725295	0.0120065	0.00930875	-0.026113	0.0026922	-0.00276239	-0.026336	-0.00650243	-0.00311986	-0.00758864	0.0165053
Tropheops_lilac	TW	Thumbi West	Tropheops_lilac-TW	S	TrliTW010159	0.0190422	0.025333	0.00783359	0.000710938	0.00899851	-0.0108084	0.0122652	0.0156032	-0.0301833	-0.000233039	-0.00396241	-0.00596083	-0.000464219	-0.00625983	-0.00168374	-0.0050445	0.0188328	-0.0141495	0.00111488	0.0399169
Tropheops_lilac	TW	Thumbi West	Tropheops_lilac-TW	S	TrliTW010196	0.0196886	-0.0113623	0.00198001	0.00105947	0.0174738	0.0481975	-0.00236771	0.0100313	-0.024635	0.0155624	0.0397901	0.0181315	0.0143252	0.0118944	-0.0167655	-0.00158232	0.00375289	0.00482514	0.00805951	0.0209171
Tropheops_microstoma	OP	Otter Point	Tropheops_microstoma-OP	D	TrmiOP011147	0.025047	-0.0167544	0.0130556	-0.00279973	0.00802919	0.0321093	-0.00654815	0.00578533	0.0113317	-0.0269679	0.0187491	-0.0349981	-0.0132029	0.00751993	-0.00691491	-0.0777393	-0.0154466	0.00282578	-0.00274605	-0.00988292
Tropheops_microstoma	OP	Otter Point	Tropheops_microstoma-OP	D	TrmiOP010322	0.0250658	-0.0177842	-0.00471998	0.0191655	0.013863	-0.000377498	0.0254428	0.0266873	0.00418991	-0.00187017	0.0162956	0.00677785	0.0112213	-0.0247828	-0.0237652	-0.0388199	-0.0049488	0.0167167	0.0251378	-0.00908773
Tropheops_orange_chest	ER	Eccles Reef	Tropheops_orange_chest-ER	S	TrocER010376	0.0277647	-0.03217	-0.0267178	0.0262738	-0.0113482	0.0193785	0.0158857	0.00235813	-0.00291714	-0.00727053	0.0211315	-0.0139214	0.0252915	-0.0181437	-0.0036684	-0.0674659	0.00866137	-0.0135258	0.0128617	0.0102162
Tropheops_orange_chest	TW	Thumbi West	Tropheops_orange_chest-TW	S	TrocTW010303	0.0288506	-0.0185121	0.00998618	0.0246383	0.0125697	0.0512987	0.00715413	-0.0202292	-0.00413001	-0.00250551	0.0437511	-0.0230768	0.00500975	-0.00621046	-0.00123046	-0.0382548	-0.0453285	0.00210654	0.0158754	0.00514222
Tropheops_orange_chest	TW	Thumbi West	Tropheops_orange_chest-TW	S	TrocTW010304	0.0377453	-0.00480956	-0.0464115	0.00139923	0.00934272	0.0542629	-0.00393824	-0.00227044	0.00279935	-0.00471632	0.0207676	0.00408688	0.0214976	-0.00752492	-0.0105822	-0.00632913	-0.0224878	-0.0150617	0.00205055	0.0263415
Tropheops_orange_chest	TW	Thumbi West	Tropheops_orange_chest-TW	S	TrocTW010307	0.0382044	-0.0355973	0.0183951	0.0055654	0.00168154	0.0598698	-0.0156345	-0.0121544	-0.0130314	0.0188243	0.0517029	-0.00529999	-0.0106417	0.0139485	-0.00477871	-0.00614766	-0.0127621	-0.0224233	0.0237676	0.0120349
Tropheops_red_cheek	TW	Thumbi West	Tropheops_red_cheek-TW	S	TrrcTW010160	0.0387965	-0.0305818	-0.0303013	-0.0150774	0.0127099	0.0485414	-0.01347	0.0182252	-0.00239579	-0.000709675	0.0351618	-0.0175182	-0.0177151	-0.00365358	-0.0235771	0.00524154	-0.0299759	0.0340542	0.0223206	0.00460975
Tropheops_red_cheek	TW	Thumbi West	Tropheops_red_cheek-TW	S	TrrcTW010161	0.0411862	-0.0302556	0.00472626	-0.00600044	0.012274	0.0431643	0.00475453	-0.00211844	0.0152014	0.00347364	0.0386014	0.003705	-0.00356438	0.00550448	-0.00521233	-0.0150328	-0.0177674	0.0132325	-0.00139519	0.0211305
Tropheops_red_cheek	TW	Thumbi West	Tropheops_red_cheek-TW	S	TrrcTW010163	0.0426399	0.0156341	-0.0293013	-0.0111512	0.00279444	0.0238334	0.0078078	0.0172953	0.0114178	-0.00712533	0.0401923	-0.0332318	-0.0250893	0.0192957	0.000699979	0.00138326	0.00199104	0.027748	-0.0109132	0.0172941
Tropheops_white_dorsal	NM	Nantumbwi	Tropheops_white_dorsal-NM	S	TrwdNM010398	0.0471505	-0.00167125	0.00969325	0.000654053	-0.0012372	0.0301454	-0.00764119	-0.0115492	-0.00989467	0.0102282	0.0502849	0.014328	0.015512	-0.012642	-0.0022323	0.0280007	-0.0097581	0.0208523	0.0200969	0.00307215
Tropheops_zimbawe	ZR	Zimbawe Rock	Tropheops_zimbawe-ZR	S	TrzrZR011115	0.0527092	0.00598261	0.0169545	-0.0207574	-0.00445911	0.0329179	-0.0155726	0.0136423	-0.00467541	-0.0131966	0.0385088	-0.0360827	0.00557673	0.0182797	-0.00290673	0.00278771	-0.0158628	0.00083984	0.0164209	0.0144589
Tropheops_zimbawe	ZR	Zimbawe Rock	Tropheops_zimbawe-ZR	S	TrzrZR011118	0.0551367	0.0218648	0.021027	-0.00170473	-0.00776664	0.0149966	0.000331385	-0.0107675	0.00921661	0.0142382	0.0598759	0.0149705	0.0271564	0.0192478	0.00946318	0.0170735	-0.0434629	-0.0131814	0.00206564	0.00809388
Tropheops_zimbawe	ZR	Zimbawe Rock	Tropheops_zimbawe-ZR	S	TrzrZR011121	0.06767	0.0184706	0.0246724	0.0201307	0.0105916	0.0327731	-0.0104804	-0.0231436	0.000889241	-0.00166032	0.0678245	-0.00381116	0.0116997	0.0090499	-0.00745657	-0.00950035	-0.0492408	-0.00151641	-0.0185586	0.013447

## Sheet: TableS3
Mandible MANOVA
Natural Population								Experimental Population
PC1	Df	Sum Sq	Mean Sq	F value	Pr(>F)			PC1	Df	Sum Sq	Mean Sq	F value	Pr(>F)
Depth	1	0.011105	0.011105	32.288	1.464e-05			Depth	1	4.88e-05	4.8753e-05	0.225	0.6383
Residuals	20	0.0068788	0.0003439					Residuals	34	0.0073667	0.00021667
PC2	Df	Sum Sq	Mean Sq	F value	Pr(>F)			PC2	Df	Sum Sq	Mean Sq	F value	Pr(>F)
Depth	1	0.0001621	0.00016207	0.4446	0.5125			Depth	1	6.67e-05	6.6705e-05	0.3726	0.5456
Residuals	20	0.0072908	0.00036454					Residuals	34	0.0060862	0.00017901
PC3	Df	Sum Sq	Mean Sq	F value	Pr(>F)			PC3	Df	Sum Sq	Mean Sq	F value	Pr(>F)
Depth	1	0.0002826	0.00028262	0.8989	0.3544			Depth	1	0.000578	0.00057802	4.3152	0.0454
Residuals	20	0.0062884	0.00031442					Residuals	34	0.0045543	0.00013395
PC4	Df	Sum Sq	Mean Sq	F value	Pr(>F)			PC4	Df	Sum Sq	Mean Sq	F value	Pr(>F)
Depth	1	4.7e-05	4.7032e-05	0.2187	0.6451			Depth	1	0.0003705	0.00037047	3.3768	0.0748
Residuals	20	0.0043018	0.00021509					Residuals	34	0.0037302	0.00010971
PC5	Df	Sum Sq	Mean Sq	F value	Pr(>F)			PC5	Df	Sum Sq	Mean Sq	F value	Pr(>F)
Depth	1	6e-05	6.0018e-05	0.3555	0.5577			Depth	1	1.06e-05	1.0583e-05	0.1019	0.7515
Residuals	20	0.0033765	0.00016882					Residuals	34	0.0035312	0.00010386
Pharyngeal jaw MANOVA
Natural Population								Experimental Population
PC1	Df	Sum Sq	Mean Sq	F value	Pr(>F)			PC1	Df	Sum Sq	Mean Sq	F value	Pr(>F)
Depth	1	0.0072445	0.0072445	24.855	7.107e-05			Depth	1	0.0002361	0.00023609	1.2798	0.2672
Residuals	20	0.0058295	0.0002915					Residuals	29	0.0053498	0.00018447
PC2	Df	Sum Sq	Mean Sq	F value	Pr(>F)			PC2	Df	Sum Sq	Mean Sq	F value	Pr(>F)
Depth	1	0.0001088	0.00010882	0.5233	0.4778			Depth	1	0.000986	0.00098601	7.249	0.01166
Residuals	20	0.0041588	0.00020794					Residuals	29	0.0039446	0.00013602
PC3	Df	Sum Sq	Mean Sq	F value	Pr(>F)			PC3	Df	Sum Sq	Mean Sq	F value	Pr(>F)
Depth	1	0.0001589	0.00015888	0.8765	0.3603			Depth	1	0.0008193	0.00081934	7.4357	0.01074
Residuals	20	0.0036253	0.00018126					Residuals	29	0.0031955	0.00011019
PC4	Df	Sum Sq	Mean Sq	F value	Pr(>F)			PC4	Df	Sum Sq	Mean Sq	F value	Pr(>F)
Depth	1	1.08e-06	1.076e-06	0.0088	0.9262			Depth	1	0.00034807	0.00034807	3.5476	0.0697
Residuals	20	0.00244388	0.00012219					Residuals	29	0.00284533	9.811e-05
PC5	Df	Sum Sq	Mean Sq	F value	Pr(>F)			PC5	Df	Sum Sq	Mean Sq	F value	Pr(>F)
Depth	1	1.903e-05	1.9027e-05	0.1878	0.6694			Depth	1	6.91e-06	6.911e-06	0.0734	0.7883
Residuals	20	0.00202654	0.00010133					Residuals	29	0.00272959	9.4124e-05
Maxilla MANOVA
Natural Population								Experimental Population
PC1	Df	Sum Sq	Mean Sq	F value	Pr(>F)			PC1	Df	Sum Sq	Mean Sq	F value	Pr(>F)
Depth	1	0.0111379	0.0111379	36.037	7.195e-06			Depth	1	0.0005743	0.00057425	2.8513	0.1005
Residuals	20	0.0061814	0.0003091					Residuals	34	0.0068476	0.0002014
PC2	Df	Sum Sq	Mean Sq	F value	Pr(>F)			PC2	Df	Sum Sq	Mean Sq	F value	Pr(>F)
Depth	1	9e-07	9.11e-07	0.0033	0.9548			Depth	1	0.0014121	0.0014121	12.184	0.001356
Residuals	20	0.0055235	0.00027617					Residuals	34	0.0039406	0.0001159
PC3	Df	Sum Sq	Mean Sq	F value	Pr(>F)			PC3	Df	Sum Sq	Mean Sq	F value	Pr(>F)
Depth	1	0.0001164	0.00011641	0.6833	0.4182			Depth	1	2.2e-06	2.219e-06	0.0217	0.8836
Residuals	20	0.0034074	0.00017037					Residuals	34	0.0034689	0.00010203
PC4	Df	Sum Sq	Mean Sq	F value	Pr(>F)			PC4	Df	Sum Sq	Mean Sq	F value	Pr(>F)
Depth	1	1.979e-05	1.9793e-05	0.1414	0.7109			Depth	1	4.81e-05	4.8084e-05	0.4894	0.489
Residuals	20	0.00279975	0.00013999					Residuals	34	0.0033405	9.8249e-05
PC5	Df	Sum Sq	Mean Sq	F value	Pr(>F)			PC5	Df	Sum Sq	Mean Sq	F value	Pr(>F)
Depth	1	2.439e-05	2.4391e-05	0.1838	0.6727			Depth	1	5.552e-05	5.5516e-05	0.7754	0.3847
Residuals	20	0.00265449	0.00013272					Residuals	34	0.00243424	7.1595e-05
Pre-maxilla MANOVA
Natural Population								Experimental Population
PC1	Df	Sum Sq	Mean Sq	F value	Pr(>F)			PC1	Df	Sum Sq	Mean Sq	F value	Pr(>F)
Depth	1	0.0003822	0.00038218	0.6133	0.4427			Depth	1	1.03e-05	1.03e-05	0.0275	0.8692
Residuals	20	0.0124636	0.00062318					Residuals	34	0.0127159	0.000374
PC2	Df	Sum Sq	Mean Sq	F value	Pr(>F)			PC2	Df	Sum Sq	Mean Sq	F value	Pr(>F)
Depth	1	0.0033889	0.0033889	9.7223	0.005418			Depth	1	0.0006984	0.00069844	3.4121	0.07344
Residuals	20	0.0069714	0.0003486					Residuals	34	0.0069596	0.0002047
PC3	Df	Sum Sq	Mean Sq	F value	Pr(>F)			PC3	Df	Sum Sq	Mean Sq	F value	Pr(>F)
Depth	1	1.5e-05	1.4971e-05	0.0505	0.8244			Depth	1	0.0006804	0.00068042	4.0343	0.05258
Residuals	20	0.005925	0.00029625					Residuals	34	0.0057344	0.00016866
PC4	Df	Sum Sq	Mean Sq	F value	Pr(>F)			PC4	Df	Sum Sq	Mean Sq	F value	Pr(>F)
Depth	1	0.00056595	0.00056595	4.0649	0.05742			Depth	1	0.0006336	0.00063358	5.2226	0.02865
Residuals	20	0.00278461	0.00013923					Residuals	34	0.0041248	0.00012132
PC5	Df	Sum Sq	Mean Sq	F value	Pr(>F)			PC5	Df	Sum Sq	Mean Sq	F value	Pr(>F)
Depth	1	0.00035818	0.00035818	2.8372	0.1076			Depth	1	8.186e-05	8.186e-05	0.9071	0.3476
Residuals	20	0.00252483	0.00012624					Residuals	34	0.00306839	9.0247e-05

## Sheet: TableS4
Mandible										Pharyngeal Jaw							Maxilla								PreMaxilla
Landmarks	AntPos	SimpleFunction	ArticularFunction	JointFunction	Quadrate Function	ComplexFunction	ComplexFunctionII			Landmarks	AntPos	DorVen	Wings	Muscle	MuscleSplit		Landmarks	AntPos	DorVen	InterMxLigament	BigA1Muscle	Function	FunctionMxTip		Landmarks	DorVen	AntPos	Tooth	MxConnect
1	A	A	A	A	A	A	A			1	A	A	A	A	A		1	A	A	A	A	A	A		1	A	A	A	A
2	A	A	A	A	A	A	A			2	B	A	A	A	A		2	A	A	B	C	C	C		2	A	A	A	A
3	A	B	A	B	B	B	B			3	B	A	B	B	B		3	B	B	C	D	D	D		3	B	A	B	D
4	A	B	A	B	B	B	B			4	B	A	B	B	B		4	B	A	C	D	E	F		4	B	A	B	D
5	B	C	D	C	E	E	F			5	B	A	B	B	B		5	A	A	A	A	A	A		5	B	B	B	C
6	B	C	D	C	E	E	F			6	B	A	B	B	B		6	A	A	A	A	A	A		6	A	A	A	A
7	B	C	B	C	C	C	C			7	B	A	C	A	A		7	A	B	B	B	B	B		7	A	A	A	A
8	B	C	B	C	C	C	C			8	B	B	C	C	C		8	A	B	B	B	B	B		8	A	A	A	A
9	B	C	C	C	E	D	E			9	A	B	C	C	C		9	A	B	B	B	B	B		9	A	A	A	B
10	B	C	A	D	D	B	D			10	A	B	C	D	D		10	A	B	B	B	B	B		10	A	A	A	B
11	A	A	A	A	A	A	A			11	A	A	A	A	A		11	A	B	B	B	B	B		11	B	B	C	B
12	A	A	A	A	A	A	A			12	A	A	A	A	A		12	A	B	B	B	B	B		12	B	B	C	B
13	B	C	B	C	C	C	C			13	A	A	A	A	A		13	A	A	B	C	C	C		13	B	B	C	C
14	A	A	A	A	A	A	A			14	A	A	A	A	A		14	A	A	B	C	C	C		14	B	B	C	C
15	A	A	A	A	A	A	A			15	A	A	A	A	A		15	A	A	A	A	A	A		15	B	B	C	C
16	A	A	A	A	A	A	A			16	B	A	A	A	A		16	A	A	A	A	A	A		16	B	A	B	D
17	A	A	A	A	A	A	A			17	B	A	A	A	A		17	A	A	A	A	A	A		17	B	A	B	D
18	A	A	A	A	A	A	A			18	B	A	A	A	A		18	A	A	A	A	A	A		18	B	A	B	D
19	A	A	A	A	A	A	A			19	B	A	A	A	A		19	A	A	A	A	A	A		19	B	A	B	D
20	A	A	A	A	A	A	A			20	B	A	B	B	B		20	B	B	C	D	D	A		20	B	A	B	D
21	A	A	A	A	A	A	A			21	B	A	B	B	B		21	B	B	C	D	D	A		21	B	B	B	D
22	A	A	A	A	A	A	A			22	B	A	A	A	A		22	B	B	C	D	D	D		22	B	B	B	D
23	A	A	A	A	A	A	A			23	B	A	A	A	A		23	B	B	C	D	D	D		23	B	B	B	C
24	A	A	A	A	A	A	A			24	B	A	A	A	A		24	B	B	C	D	D	D		24	B	B	B	C
25	A	A	A	A	A	A	A			25	B	A	A	A	A		25	B	B	C	D	D	D		25	B	B	B	C
26	A	A	A	A	A	A	A			26	B	B	C	C	C		26	B	B	C	D	D	D
27	A	A	A	A	A	A	A			27	B	B	C	C	C		27	B	B	C	D	D	E
28	A	A	A	A	A	A	A			28	B	B	C	C	C		28	B	B	C	D	D	E
29	A	A	A	A	A	A	A			29	B	B	C	C	C		29	B	B	C	D	D	E
30	A	A	A	A	A	A	A			30	B	B	C	C	C		30	B	A	C	D	E	E
31	A	A	A	A	A	A	A			31	A	B	C	D	D		31	B	A	C	D	E	E
32	A	A	A	A	A	A	A			32	A	B	C	D	D		32	B	A	C	D	E	F
33	A	A	A	A	A	A	A			33	A	B	C	D	D		33	B	A	C	D	E	F
34	A	A	A	A	A	A	A			34	A	B	C	D	D		34	B	A	C	D	E	F
35	A	A	A	A	A	A	A			35	A	B	C	D	D		35	A	A	B	C	C	C
36	A	A	A	A	A	A	A			36	B	B	C	C	E		36	A	A	B	C	C	C
37	A	A	A	A	A	A	A			37	B	B	C	C	E		37	A	A	B	C	C	C
38	A	A	A	A	A	A	A			38	B	B	C	C	E		38	A	A	B	C	C	C
39	A	A	A	A	A	A	A			39	B	B	C	C	E		39	A	A	B	C	C	C
40	A	B	A	B	B	B	B			40	B	B	C	C	E		40	B	A	C	D	E	E
41	A	B	A	B	B	B	B			41	B	B	C	C	E		41	B	A	C	D	E	E
42	A	B	A	B	B	B	B			42	B	B	C	C	E		42	B	A	C	D	E	E
43	A	B	A	B	B	B	B			43	B	B	C	C	E		43	B	A	C	D	E	F
44	A	B	A	B	B	B	B			44	B	B	C	C	E		44	B	A	C	D	E	F
45	A	B	A	B	B	B	B			45	B	B	C	C	E
46	A	B	A	B	B	B	B
47	A	B	A	B	B	B	B
48	A	B	A	B	B	B	B
49	A	B	A	B	B	B	B
50	B	C	D	C	E	E	F
51	B	C	D	C	E	E	F
52	B	C	D	C	E	E	F
53	B	C	D	C	E	E	F
54	B	C	D	C	E	E	F
55	B	C	D	C	E	E	F
56	B	C	D	C	E	E	F
57	B	C	D	C	E	E	F
58	B	C	D	C	E	E	F
59	B	C	D	C	E	E	F
60	B	C	D	C	E	E	F
61	B	C	D	C	E	E	F
62	B	C	D	C	E	E	F
63	B	C	B	C	C	C	C
64	B	C	B	C	C	C	C
65	B	C	B	C	C	C	C
66	B	C	B	C	C	C	C
67	B	C	B	C	C	C	C
68	B	C	B	C	C	C	C
69	B	C	C	C	E	D	E
70	B	C	C	C	E	D	E
71	B	C	C	C	E	D	E
72	B	C	C	C	E	D	E
73	B	C	C	C	E	D	E
74	B	C	C	C	E	D	E
75	B	C	C	C	E	D	E
76	B	C	C	C	E	D	E
77	B	C	C	C	E	D	E
78	B	C	C	C	E	D	E
79	B	C	C	C	E	D	E
80	B	C	C	C	E	D	E
81	B	C	C	C	E	D	E
82	B	C	C	C	E	D	E
83	B	C	C	D	D	B	D
84	B	C	C	D	D	B	D
85	B	C	C	D	D	B	D
86	B	C	C	D	D	B	D
87	B	C	C	D	D	B	D
88	B	C	A	D	D	B	D
89	B	C	A	D	D	B	D
90	B	C	A	D	D	B	D
91	B	C	A	D	D	B	D
92	B	C	A	D	D	B	D
93	B	C	A	D	D	B	D
94	B	C	A	D	D	B	D
95	A	A	A	D	D	B	D
96	A	A	A	D	D	B	D
97	A	A	A	D	D	B	D
98	A	A	A	D	D	B	D
99	A	A	A	D	D	B	D
100	A	A	A	D	D	B	D
101	A	A	A	D	D	B	D
102	A	A	A	D	D	B	D
103	A	A	A	A	A	A	A
104	A	A	A	A	A	A	A
105	A	A	A	A	A	A	A
106	A	A	A	A	A	A	A
107	A	A	A	A	A	A	A
108	A	A	A	A	A	A	A
109	A	A	A	A	A	A	A

## Sheet: TableS5
Natural Populations - Mean
Mandible
Deep									Shallow
Models	MaxL	K	n	AICc	dAICc	Model_L	Post_Pob		Models	MaxL	K	n	AICc	dAICc	Model_L	Post_Pob
ComplexFunction.sep.Mod + same.between	3367.85	7	5886	-6721.69	0.977445	0.82266	0.62813		ComplexFunctionII.sep.Mod + same.between	5667.69	8	5886	-11319.4	0	1	0.99144
ComplexFunctionII.sep.Mod + sep.between	3381.46	22	5886	-6718.74	3.92561	0.339762	0.200047		ComplexFunctionII.sep.Mod + sep.between	5675.85	22	5886	-11307.5	11.8156	0.00926879	0.00855044
ComplexFunction.sep.Mod + sep.between	3374.24	16	5886	-6716.4	6.27111	0.0649943	0.0423472		ComplexFunctionII.same.Mod + same.between	5648.02	3	5886	-11290	29.3196	8.64978e-06	8.5785e-06
QuadrateFunction.sep.Mod + sep.between	3373.45	16	5886	-6714.81	7.85122	0.17799	0.0877948		ComplexFunction.sep.Mod + same.between	5648.98	7	5886	-11283.9	35.418	7.90459e-07	7.84428e-07
ComplexFunctionII.sep.Mod + same.between	3363.8	8	5886	-6711.57	11.0946	0.0258445	0.0147079		ComplexFunctionII.same.Mod + sep.between	5656.19	17	5886	-11278.3	41.0874	7.3878e-08	7.16796e-08
ComplexFunction.same.Mod + same.between	3357.64	3	5886	-6709.29	13.38	0.0323342	0.0140274		QuadrateFunction.sep.Mod + same.between	5645.95	7	5886	-11277.9	41.4806	6.43719e-08	6.32631e-08
QuadrateFunction.sep.Mod + same.between	3359.06	7	5886	-6704.1	18.5628	0.0123847	0.00459321		ComplexFunction.sep.Mod + sep.between	5654.1	16	5886	-11276.1	43.2393	8.30214e-09	8.14808e-09
ComplexFunction.same.Mod + sep.between	3364.03	12	5886	-6704.02	18.6491	0.00327454	0.00154325		QuadrateFunction.sep.Mod + sep.between	5651.11	16	5886	-11270.1	49.2192	2.69622e-09	2.58252e-09
QuadrateFunction.same.Mod + sep.between	3363.53	12	5886	-6703	19.6702	0.00925146	0.00459074		QuadrateFunction.same.Mod + same.between	5634.68	3	5886	-11263.4	56.0078	3.73718e-10	3.69073e-10
ComplexFunctionII.same.Mod + sep.between	3367.62	17	5886	-6701.13	21.5384	0.00140912	0.000635731		ComplexFunction.same.Mod + same.between	5634.29	3	5886	-11262.6	56.7728	3.55805e-10	3.51374e-10
JointFunction.sep.Mod + sep.between	3359.4	11	5886	-6696.76	25.9077	0.000293544	0.000123278		JointFunction.sep.Mod + same.between	5636.76	6	5886	-11261.5	57.843	4.2897e-11	3.9865e-11
ComplexFunctionII.same.Mod + same.between	3349.96	3	5886	-6693.91	28.7553	0.00240534	0.000990458		JointFunction.sep.Mod + sep.between	5639.55	11	5886	-11257.1	62.2911	6.08925e-12	5.50472e-12
QuadrateFunction.same.Mod + same.between	3349.13	3	5886	-6692.26	30.4064	0.00096167	0.000464689		QuadrateFunction.same.Mod + sep.between	5639.84	12	5886	-11255.6	63.7218	2.28173e-11	2.23073e-11
JointFunction.sep.Mod + same.between	3347.82	6	5886	-6683.62	39.0416	1.29801e-05	4.57525e-06		ComplexFunction.same.Mod + sep.between	5639.42	12	5886	-11254.8	64.5695	7.3033e-12	7.09955e-12
JointFunction.same.Mod + sep.between	3348.22	8	5886	-6680.41	42.2593	4.45899e-07	1.93304e-07		JointFunction.same.Mod + same.between	5623.51	3	5886	-11241	78.3345	3.21607e-14	3.1969e-14
ArticularFunction.sep.Mod + same.between	3339.93	6	5886	-6667.84	54.8242	1.86983e-09	1.03486e-09		JointFunction.same.Mod + sep.between	5626.3	8	5886	-11236.6	82.7724	3.00625e-15	2.96789e-15
ArticularFunction.sep.Mod + same.between	3339.93	6	5886	-6667.84	54.8242	1.86983e-09	1.03486e-09		ArticularFunction.sep.Mod + same.between	5603.85	6	5886	-11195.7	123.668	7.69336e-24	7.61443e-24
JointFunction.same.Mod + same.between	3336.63	3	5886	-6667.26	55.4033	1.56272e-08	5.67249e-09		ArticularFunction.sep.Mod + same.between	5603.85	6	5886	-11195.7	123.668	7.69336e-24	7.61443e-24
ArticularFunction.sep.Mod + sep.between	3343.24	11	5886	-6664.44	58.2211	6.50134e-10	3.58614e-10		SimpleFunction.sep.Mod + same.between	5601.98	5	5886	-11193.9	125.412	7.01107e-24	6.94276e-24
ArticularFunction.sep.Mod + sep.between	3343.24	11	5886	-6664.44	58.2211	6.50134e-10	3.58614e-10		SimpleFunction.sep.Mod + same.between	5601.98	5	5886	-11193.9	125.412	7.01107e-24	6.94276e-24
ArticularFunction.same.Mod + same.between	3332.38	3	5886	-6658.76	63.9042	7.18983e-10	3.67301e-10		SimpleFunction.sep.Mod + sep.between	5603.5	7	5886	-11193	126.368	4.78927e-24	4.74099e-24
ArticularFunction.same.Mod + same.between	3332.38	3	5886	-6658.76	63.9042	7.18983e-10	3.67301e-10		SimpleFunction.sep.Mod + sep.between	5603.5	7	5886	-11193	126.368	4.78927e-24	4.74099e-24
ArticularFunction.same.Mod + sep.between	3335.7	8	5886	-6655.38	67.2909	1.48442e-10	8.40722e-11		ArticularFunction.sep.Mod + sep.between	5606.25	11	5886	-11190.5	128.905	5.04754e-25	4.9805e-25
ArticularFunction.same.Mod + sep.between	3335.7	8	5886	-6655.38	67.2909	1.48442e-10	8.40722e-11		ArticularFunction.sep.Mod + sep.between	5606.25	11	5886	-11190.5	128.905	5.04754e-25	4.9805e-25
SimpleFunction.sep.Mod + sep.between	3324.07	7	5886	-6634.13	88.5364	2.94211e-14	2.09887e-14		SimpleFunction.same.Mod + same.between	5592.06	3	5886	-11178.1	141.233	6.57101e-27	6.46582e-27
SimpleFunction.sep.Mod + sep.between	3324.07	7	5886	-6634.13	88.5364	2.94211e-14	2.09887e-14		SimpleFunction.same.Mod + same.between	5592.06	3	5886	-11178.1	141.233	6.57101e-27	6.46582e-27
SimpleFunction.sep.Mod + same.between	3321.2	5	5886	-6632.4	90.271	8.64505e-15	4.97988e-15		SimpleFunction.same.Mod + sep.between	5593.59	5	5886	-11177.2	142.186	5.67477e-27	5.57968e-27
SimpleFunction.sep.Mod + same.between	3321.2	5	5886	-6632.4	90.271	8.64505e-15	4.97988e-15		SimpleFunction.same.Mod + sep.between	5593.59	5	5886	-11177.2	142.186	5.67477e-27	5.57968e-27
SimpleFunction.same.Mod + sep.between	3317.26	5	5886	-6624.51	98.1543	4.86828e-16	3.19818e-16		AntPos.same.Mod + same.between	5586.1	3	5886	-11166.2	153.153	1.3016e-28	1.2765e-28
SimpleFunction.same.Mod + sep.between	3317.26	5	5886	-6624.51	98.1543	4.86828e-16	3.19818e-16		AntPos.sep.Mod + same.between	5586.17	4	5886	-11164.3	155.014	6.10343e-29	5.98626e-29
SimpleFunction.same.Mod + same.between	3314.39	3	5886	-6622.77	99.8916	1.66502e-16	8.76203e-17		ArticularFunction.same.Mod + same.between	5583.58	3	5886	-11161.1	158.199	2.01771e-30	2.00732e-30
SimpleFunction.same.Mod + same.between	3314.39	3	5886	-6622.77	99.8916	1.66502e-16	8.76203e-17		ArticularFunction.same.Mod + same.between	5583.58	3	5886	-11161.1	158.199	2.01771e-30	2.00732e-30
AntPos.same.Mod + same.between	3313.63	3	5886	-6621.25	101.418	1.01005e-16	8.03828e-17		ArticularFunction.same.Mod + sep.between	5585.98	8	5886	-11155.9	163.426	1.23599e-31	1.22799e-31
AntPos.sep.Mod + same.between	3313.84	4	5886	-6619.68	102.986	4.86203e-17	3.80274e-17		ArticularFunction.same.Mod + sep.between	5585.98	8	5886	-11155.9	163.426	1.23599e-31	1.22799e-31
No.modules.default	3301.4	2	5886	-6598.79	123.876	2.82557e-20	1.86226e-20		No.modules.default	5554.42	2	5886	-11104.9	214.507	2.65692e-41	2.64145e-41
Pharyngeal jaw
Deep									Shallow
Models	MaxL	K	n	AICc	dAICc	Model_L	Post_Pob		Models	MaxL	K	n	AICc	dAICc	Model_L	Post_Pob
MuscleSplit.same.Mod + same.between	531.588	3	990	-1057.15	0	1	0.940232		MuscleSplit.sep.Mod + same.between	871.391	7	990	-1728.67	0.0298068	0.991001	0.912352
MuscleSplit.sep.Mod + same.between	532.421	7	990	-1050.73	6.42349	0.0455312	0.0418118		AntPos.sep.Mod + same.between	863.283	4	990	-1718.53	10.1732	0.0684612	0.0425797
Muscle.same.Mod + same.between	526.653	3	990	-1047.28	9.86957	0.0105574	0.00970471		AntPos.same.Mod + same.between	862.243	3	990	-1718.46	10.2368	0.0621185	0.0386211
Muscle.sep.Mod + same.between	528.691	6	990	-1045.3	11.8551	0.00356064	0.00331278		MuscleSplit.same.Mod + same.between	861.45	3	990	-1716.88	11.8234	0.00590678	0.00495016
Wings.sep.Mod + same.between	527.042	5	990	-1044.02	13.1287	0.00189967	0.00177721		MuscleSplit.sep.Mod + sep.between	874.009	16	990	-1715.46	13.2394	0.00160951	0.00148167
MuscleSplit.same.Mod + sep.between	534.092	12	990	-1043.87	13.2864	0.00165069	0.00151841		MuscleSplit.same.Mod + sep.between	864.067	12	990	-1703.82	24.883	1.19697e-05	1.04605e-05
Wings.sep.Mod + sep.between	527.605	7	990	-1041.1	16.0557	0.000455049	0.00042472		Muscle.same.Mod + same.between	853.461	3	990	-1700.9	27.8005	4.04253e-06	2.99132e-06
Muscle.same.Mod + sep.between	528.313	8	990	-1040.48	16.6718	0.000506738	0.000453596		Muscle.sep.Mod + same.between	855.476	6	990	-1698.87	29.8324	1.17393e-06	8.94726e-07
Wings.same.Mod + same.between	522.885	3	990	-1039.75	17.4055	0.000329285	0.000301403		Wings.same.Mod + same.between	851.367	3	990	-1696.71	31.9887	6.93945e-07	5.20665e-07
Muscle.sep.Mod + sep.between	530.351	11	990	-1038.43	18.7194	0.000155604	0.000142913		Muscle.same.Mod + sep.between	855.27	8	990	-1694.39	34.3045	1.91852e-07	1.51785e-07
MuscleSplit.sep.Mod + sep.between	534.925	16	990	-1037.29	19.8599	0.000105645	9.15334e-05		Wings.same.Mod + sep.between	852.135	5	990	-1694.21	34.4898	2.08808e-07	1.60687e-07
Wings.same.Mod + sep.between	523.448	5	990	-1036.84	20.316	8.60244e-05	7.83226e-05		Wings.sep.Mod + same.between	851.443	5	990	-1692.82	35.8744	1.00567e-07	7.53533e-08
DorVen.same.Mod + same.between	520.417	3	990	-1034.81	22.3406	4.20924e-05	3.82642e-05		Muscle.sep.Mod + sep.between	857.285	11	990	-1692.3	36.3984	5.43662e-08	4.41395e-08
DorVen.sep.Mod + same.between	520.761	4	990	-1033.48	23.6696	1.80492e-05	1.64822e-05		DorVen.same.Mod + same.between	848.618	3	990	-1691.21	37.4862	4.80017e-08	3.44788e-08
AntPos.sep.Mod + same.between	520.012	4	990	-1031.98	25.168	9.85423e-05	8.59949e-05		DorVen.sep.Mod + same.between	849.437	4	990	-1690.83	37.8647	3.60769e-08	2.74839e-08
AntPos.same.Mod + same.between	517.77	3	990	-1029.52	27.6347	8.07206e-06	7.17912e-06		Wings.sep.Mod + sep.between	852.21	7	990	-1690.31	38.3919	2.98959e-08	2.29453e-08
No.modules.default	515.448	2	990	-1026.88	30.2675	2.68763e-06	2.37682e-06		No.modules.default	844.3	2	990	-1684.59	44.111	1.88826e-09	1.31122e-09
Maxilla
Deep									Shallow
Models	MaxL	K	n	AICc	dAICc	Model_L	Post_Pob		Models	MaxL	K	n	AICc	dAICc	Model_L	Post_Pob
Function.same.Mod + same.between	538.314	3	946	-1070.6	0.0542731	0.981405	0.515397		Function.same.Mod + same.between	944.535	3	946	-1883.05	0.3658	0.883008	0.55563
FunctionMxTip.same.Mod + same.between	537.822	3	946	-1069.62	1.0381	0.634379	0.323479		FunctionMxTip.same.Mod + same.between	944.011	3	946	-1882	1.41295	0.618974	0.366303
Function.sep.Mod + same.between	539.804	7	946	-1065.49	5.16791	0.0851048	0.0444673		Function.sep.Mod + same.between	946.384	7	946	-1878.65	4.76179	0.109547	0.0665785
DorVen.same.Mod + same.between	535.096	3	946	-1064.17	6.49075	0.0479409	0.0248054		FunctionMxTip.sep.Mod + same.between	945.514	8	946	-1874.87	8.5373	0.0169504	0.00996831
BigA1Muscle.same.Mod + same.between	534.982	3	946	-1063.94	6.71798	0.0383346	0.0198128		BigA1Muscle.sep.Mod + same.between	940.469	6	946	-1868.85	14.5618	0.000949216	0.000558145
InterMxLigament.same.Mod + same.between	534.832	3	946	-1063.64	7.01837	0.033297	0.0171256		Function.same.Mod + sep.between	946.503	12	946	-1868.67	14.7399	0.000734392	0.000458255
FunctionMxTip.sep.Mod + same.between	539.409	8	946	-1062.66	7.99372	0.0207625	0.0105108		FunctionMxTip.same.Mod + sep.between	950.538	17	946	-1866.42	16.9947	0.00035583	0.000205916
DorVen.sep.Mod + same.between	535.29	4	946	-1062.54	8.11885	0.0221331	0.0114909		BigA1Muscle.same.Mod + same.between	935.972	3	946	-1865.92	17.4921	0.000227141	0.000139793
AntPos.same.Mod + same.between	534.19	3	946	-1062.36	8.30191	0.0174735	0.00901832		Function.sep.Mod + sep.between	948.351	16	946	-1864.12	19.2932	8.77902e-05	5.28476e-05
BigA1Muscle.sep.Mod + same.between	536.911	6	946	-1061.73	8.92409	0.0128261	0.00658329		DorVen.same.Mod + same.between	934.754	3	946	-1863.48	19.9281	8.494e-05	5.33884e-05
No.modules.default	532.632	2	946	-1061.25	9.40644	0.0104372	0.00531408		DorVen.sep.Mod + same.between	934.836	4	946	-1861.63	21.7802	3.36767e-05	2.12088e-05
AntPos.sep.Mod + same.between	534.23	4	946	-1060.42	10.2391	0.00659354	0.00340385		InterMxLigament.same.Mod + same.between	933.419	3	946	-1860.81	22.5988	1.79148e-05	1.10048e-05
InterMxLigament.sep.Mod + same.between	535.217	5	946	-1060.37	10.287	0.0065482	0.00335725		BigA1Muscle.sep.Mod + sep.between	940.894	11	946	-1859.51	23.9059	8.84892e-06	5.21032e-06
InterMxLigament.same.Mod + sep.between	534.922	5	946	-1059.78	10.8767	0.00474181	0.00244319		FunctionMxTip.sep.Mod + sep.between	952.04	22	946	-1858.98	24.4278	9.10762e-06	5.25373e-06
Function.same.Mod + sep.between	541.544	12	946	-1058.75	11.904	0.00302812	0.00161874		InterMxLigament.sep.Mod + same.between	934.233	5	946	-1858.4	25.0082	5.30016e-06	3.22256e-06
InterMxLigament.sep.Mod + sep.between	535.307	7	946	-1056.49	14.1625	0.000920823	0.000472866		InterMxLigament.same.Mod + sep.between	933.638	5	946	-1857.21	26.1994	2.93492e-06	1.80831e-06
BigA1Muscle.same.Mod + sep.between	536.197	8	946	-1056.24	14.4164	0.000833982	0.000434808		AntPos.same.Mod + same.between	931.36	3	946	-1856.69	26.7157	2.58138e-06	1.57417e-06
BigA1Muscle.sep.Mod + sep.between	538.126	11	946	-1053.97	16.6875	0.000266259	0.000138114		BigA1Muscle.same.Mod + sep.between	936.396	8	946	-1856.64	26.7713	2.19867e-06	1.35706e-06
Function.sep.Mod + sep.between	543.034	16	946	-1053.48	17.1749	0.000232731	0.00012368		AntPos.sep.Mod + same.between	931.436	4	946	-1854.83	28.5819	1.01756e-06	6.22761e-07
FunctionMxTip.same.Mod + sep.between	540.538	17	946	-1046.42	24.2417	6.10256e-06	3.16131e-06		InterMxLigament.sep.Mod + sep.between	934.452	7	946	-1854.79	28.626	8.59237e-07	5.23352e-07
FunctionMxTip.sep.Mod + sep.between	542.124	22	946	-1039.15	31.5061	1.68802e-07	8.69863e-08		No.modules.default	927.533	2	946	-1851.05	32.3574	1.84427e-07	1.13049e-07
Pre-Maxilla
Deep									Shallow
Models	MaxL	K	n	AICc	dAICc	Model_L	Post_Pob		Models	MaxL	K	n	AICc	dAICc	Model_L	Post_Pob
Tooth.same.Mod + same.between	167.284	3	300	-328.488	0.0152712	0.992975	0.281937		MxConnect.sep.Mod + same.between	260.639	6	300	-508.992	1.13685	0.718395	0.336266
MxConnect.same.Mod + same.between	166.635	3	300	-327.189	1.31432	0.567448	0.150095		MxConnect.sep.Mod + sep.between	265.462	11	300	-508.006	2.12289	0.546652	0.252481
DorVen.sep.Mod + same.between	167.348	4	300	-326.56	1.94307	0.421048	0.10947		Tooth.sep.Mod + same.between	259.084	5	300	-507.965	2.16464	0.588783	0.266781
Tooth.sep.Mod + same.between	168.175	5	300	-326.147	2.35606	0.317054	0.0880439		Tooth.sep.Mod + sep.between	259.689	7	300	-504.995	5.13477	0.12241	0.0539656
AntPos.same.Mod + same.between	166.111	3	300	-326.14	2.36273	0.347131	0.0906363		Tooth.same.Mod + same.between	255.384	3	300	-504.687	5.44238	0.148028	0.0655245
No.modules.default	165.052	2	300	-326.064	2.43851	0.322224	0.0844723		Tooth.same.Mod + sep.between	255.989	5	300	-501.773	8.35603	0.0314505	0.0133748
DorVen.same.Mod + same.between	165.869	3	300	-325.657	2.84634	0.258656	0.0683779		MxConnect.same.Mod + same.between	253.298	3	300	-500.515	9.61452	0.0129499	0.00554532
Tooth.same.Mod + sep.between	167.416	5	300	-324.627	3.876	0.144721	0.0410222		MxConnect.same.Mod + sep.between	258.12	8	300	-499.745	10.3843	0.00973457	0.00412291
AntPos.sep.Mod + same.between	166.177	4	300	-324.219	4.28381	0.132676	0.0346874		DorVen.sep.Mod + same.between	252.181	4	300	-496.227	13.9027	0.00255968	0.000952921
MxConnect.same.Mod + sep.between	169.753	8	300	-323.012	5.49133	0.0972571	0.0241641		DorVen.same.Mod + same.between	251.078	3	300	-496.075	14.054	0.00256245	0.00094782
Tooth.sep.Mod + sep.between	168.307	7	300	-322.23	6.27326	0.0451525	0.0125254		AntPos.same.Mod + same.between	246.358	3	300	-486.634	23.4952	4.08958e-05	1.58082e-05
MxConnect.sep.Mod + same.between	167.221	6	300	-322.156	6.3466	0.0485127	0.0126132		AntPos.sep.Mod + same.between	247.363	4	300	-486.59	23.5389	5.07703e-05	1.95045e-05
MxConnect.sep.Mod + sep.between	170.34	11	300	-317.763	10.7398	0.00794946	0.00195554		No.modules.default	243.565	2	300	-483.091	27.0388	6.67497e-06	2.68853e-06

## Sheet: TableS6
Natural Population
Mandible
	Depth	Disparity (PV)	PV LCI	PV UCI	P	P LCI	P UCI	Rate (σ2)	σ2 LCI	σ2 UCI	P	P LCI	P UCI	Integration (ρ)	ρ LCI	ρ UCI
FULL	Deep	0.00239473	0.00232855	0.00249374	0.673276	0.574	0.83305	0.00155169	0.00149285	0.00166135	0.594524	0.437925	0.717	0.38974	0.36	0.41
	Shallow	0.0028432	0.00274175	0.00291528				0.00156434	0.0014675	0.0016282				0.30449	0.3	0.31
A	Deep	0.000880213	0.000864716	0.000906317	0.751916	0.681975	0.876025	1.01362e-05	9.18454e-06	1.24759e-05	0.639413	0.508975	0.74805	0.33597	0.3	0.35
	Shallow	0.000978574	0.000956525	0.000995394				9.18796e-06	8.27135e-06	1.13313e-05				0.26048	0.25	0.27
B	Deep	0.000299796	0.000291183	0.00031292	0.873933	0.833975	0.921025	1.20928e-05	1.0943e-05	1.48608e-05	0.412701	0.314975	0.506	0.49444	0.43	0.54
	Shallow	0.000390347	0.000376879	0.000400604				9.79208e-06	8.79471e-06	1.20766e-05				0.39106	0.37	0.42
C	Deep	0.00015405	0.000147898	0.00016334	0.269656	0.133	0.59	7.10134e-06	6.46766e-06	8.74588e-06	0.886308	0.71695	0.985025	0.43611	0.37	0.47
	Shallow	0.000191522	0.000181467	0.000198215				6.84946e-06	6.17582e-06	8.45656e-06				0.34536	0.33	0.36
D	Deep	0.000304179	0.000295631	0.000319816	0.817448	0.703	0.957	6.91727e-06	6.28507e-06	8.51497e-06	0.485503	0.37495	0.578025	0.44835	0.42	0.47
	Shallow	0.000329544	0.000312628	0.000340974				5.84224e-06	5.24916e-06	7.18054e-06				0.33434	0.31	0.35
E	Deep	0.000409287	0.000392462	0.000433077	0.625092	0.471975	0.87505	1.17957e-05	1.07426e-05	1.45157e-05	0.612055	0.484975	0.714025	0.48353	0.42	0.53
	Shallow	0.000479675	0.00045694	0.000496439				1.03234e-05	9.28802e-06	1.26773e-05				0.39291	0.36	0.41
F	Deep	0.000347205	0.00033341	0.000366362	0.656089	0.585975	0.759	9.38905e-06	8.52835e-06	1.1558e-05	0.843893	0.747	0.968	0.43033	0.35	0.47
	Shallow	0.000473535	0.000458161	0.000486316				9.86595e-06	8.84106e-06	1.21117e-05				0.35488	0.34	0.37
Lower Pharyngeal Jaw
Module	Depth	Disparity (PV)	PV LCI	PV UCI	P	P LCI	P UCI	Rate (σ2)	σ2 LCI	σ2 UCI	P	P LCI	P UCI	Integration (ρ)	ρ LCI	ρ UCI
FULL	Deep	0.00155169	0.00149285	0.00166135	0.839821	0.5279	0.994	1.47497e-05	1.3396e-05	1.81641e-05	0.464167	0.285975	0.597	0.44852	0.43	0.46
	Shallow	0.00156434	0.0014675	0.0016282				1.26801e-05	1.14027e-05	1.56138e-05				0.34679	0.34	0.36
A	Deep	0.000621204	0.0005958	0.000670094	0.834055	0.428975	0.994025	1.60064e-05	1.45515e-05	1.97248e-05	0.535586	0.34	0.658	0.44408	0.41	0.47
	Shallow	0.000594952	0.00055373	0.000622086				1.37922e-05	1.23857e-05	1.69866e-05				0.27965	0.26	0.3
B	Deep	0.000305298	0.000292319	0.000329444	0.575661	0.250975	0.806025	2.05281e-05	1.8639e-05	2.52871e-05	0.305127	0.195975	0.392025	0.41741	0.34	0.47
	Shallow	0.000250131	0.000229915	0.000263346				1.54712e-05	1.38556e-05	1.90105e-05				0.29486	0.27	0.32
C	Deep	0.000344853	0.000328172	0.000373824	0.550994	0.367975	0.876075	2.28132e-05	2.07243e-05	2.81807e-05	0.575018	0.42195	0.692025	0.51442	0.42	0.56
	Shallow	0.000412089	0.000381953	0.00043155				1.96563e-05	1.76851e-05	2.42236e-05				0.42172	0.37	0.45
D	Deep	0.000126735	0.000123874	0.0001322	0.736113	0.563	0.846025	9.46994e-06	8.56984e-06	1.17241e-05	0.138309	0.092	0.186025	0.5033	0.47	0.54
	Shallow	0.000114492	0.000110345	0.000117075				6.21654e-06	5.55351e-06	7.62738e-06				0.41888	0.39	0.44
E	Deep	0.000153598	0.000151466	0.000157448	0.392322	0.343	0.495025	6.79533e-06	6.15097e-06	8.36268e-06	0.449971	0.383	0.529025	0.41776	0.39	0.45
	Shallow	0.000192678	0.00018809	0.000195439				8.22095e-06	7.39905e-06	1.01192e-05				0.46923	0.45	0.49
Maxilla
Module	Depth	Disparity (PV)	PV LCI	PV UCI	P	P LCI	P UCI	Rate (σ2)	σ2 LCI	σ2 UCI	P	P LCI	P UCI	Integration (ρ)	ρ LCI	ρ UCI
FULL	Deep	0.00209161	0.0020186	0.00220335	0.923148	0.76095	0.997	2.06058e-05	1.87093e-05	2.53517e-05	0.347335	0.23595	0.453	0.3715	0.36	0.38
	Shallow	0.0021101	0.00204454	0.00216169				1.68446e-05	1.51025e-05	2.07389e-05				0.31266	0.3	0.32
A	Deep	0.000482304	0.000464582	0.000509135	0.874623	0.62995	0.996	2.66817e-05	2.41421e-05	3.28312e-05	0.159448	0.103	0.213025	0.30461	0.28	0.34
	Shallow	0.00046228	0.000447058	0.000474528				1.85631e-05	1.67005e-05	2.29809e-05				0.29982	0.27	0.32
B	Deep	0.000221862	0.000213422	0.000236351	0.58425	0.35295	0.743	1.62725e-05	1.47579e-05	2.00823e-05	0.293341	0.20795	0.371025	0.49612	0.45	0.53
	Shallow	0.000189443	0.000180711	0.000195251				1.19804e-05	1.07061e-05	1.47503e-05				0.31723	0.29	0.34
C	Deep	0.000359564	0.000349624	0.000373455	0.909907	0.801975	0.998	1.90383e-05	1.71782e-05	2.34239e-05	0.354146	0.268975	0.444	0.37599	0.36	0.39
	Shallow	0.000370847	0.000361451	0.000378942				1.49307e-05	1.34582e-05	1.84444e-05				0.385	0.35	0.41
D	Deep	0.000537074	0.000513616	0.000570945	0.834298	0.63785	0.987	2.04061e-05	1.85077e-05	2.51153e-05	0.603882	0.456975	0.721025	0.33318	0.31	0.35
	Shallow	0.000498028	0.000477332	0.000513495				1.78116e-05	1.59332e-05	2.18287e-05				0.26591	0.25	0.28
E	Deep	0.000490801	0.000475297	0.000514453	0.534475	0.442	0.7	1.98903e-05	1.80267e-05	2.44369e-05	0.802531	0.6509	0.918	0.40136	0.36	0.44
	Shallow	0.000589499	0.000575307	0.000600994				1.8673e-05	1.67282e-05	2.29462e-05				0.326	0.31	0.34
Pre-Maxilla
Module	Depth	Disparity (PV)	PV LCI	PV UCI	P	P LCI	P UCI	Rate (σ2)	σ2 LCI	σ2 UCI	P	P LCI	P UCI	Integration (ρ)	ρ LCI	ρ UCI
FULL	Deep	0.00183167	0.00178759	0.00191475	0.191498	0.148	0.278025	2.63857e-05	2.38945e-05	3.24297e-05	0.101357	0.070975	0.14705	0.40933	0.37	0.44
	Shallow	0.00259971	0.00256442	0.0026229				3.64899e-05	3.2807e-05	4.48246e-05				0.4269	0.4	0.44
A	Deep	0.000726798	0.000711155	0.000755695	0.390295	0.33895	0.493025	5.24343e-05	4.74019e-05	6.42895e-05	0.280307	0.216	0.359025	0.40038	0.35	0.44
	Shallow	0.000952716	0.000941378	0.000960467				6.71526e-05	6.01175e-05	8.24085e-05				0.2479	0.22	0.27
B	Deep	0.000232353	0.000226877	0.000240807	0.715561	0.56895	0.814075	2.29118e-05	2.07935e-05	2.814e-05	0.798056	0.680975	0.871	0.53142	0.48	0.58
	Shallow	0.000203089	0.000195438	0.000208813				2.12365e-05	1.90512e-05	2.59691e-05				0.51962	0.47	0.57
C	Deep	0.000326204	0.000316856	0.000343207	0.155482	0.124	0.2321	1.74401e-05	1.58365e-05	2.14708e-05	0.138977	0.107	0.18	0.44201	0.37	0.51
	Shallow	0.000486473	0.000477963	0.000492821				2.49024e-05	2.23903e-05	3.05905e-05				0.30272	0.28	0.32
D	Deep	0.000546311	0.000528826	0.000577236	0.156908	0.128	0.216	2.04158e-05	1.84039e-05	2.51999e-05	0.027967	0.016	0.044	0.36994	0.35	0.41
	Shallow	0.000957433	0.000949382	0.000963701				3.52468e-05	3.16674e-05	4.33498e-05				0.51978	0.48	0.54

## Sheet: TableS7
Mandible
Module	Mean Rates	LCI	UCI		Modules	A	B	C	D	E	F
A	9.53279e-06	8.62687e-06	1.17675e-05		A	X
B	1.06287e-05	9.59543e-06	1.30981e-05		B	1	X
C	6.94105e-06	6.29765e-06	8.54574e-06		C	1	0.004906	X
D	6.23316e-06	5.63669e-06	7.65642e-06		D	1	0.524124	0.999999	X
E	1.08588e-05	9.80566e-06	1.33433e-05		E	1	0.965194	0.001165	0.947478	X
F	9.69253e-06	8.76852e-06	1.19203e-05		F	1	0.975098	0.047747	0.999952	0.47127	X
Pharyngeal Jaw
Module	Mean Rates	LCI	UCI		Modules	A	B	C	D	E
A	1.45974e-05	1.31799e-05	1.79287e-05		A	X
B	1.73101e-05	1.56552e-05	2.12983e-05		B	1	X
C	2.08043e-05	1.87777e-05	2.56206e-05		C	0.997235	0.75521	X
D	7.3996e-06	6.6739e-06	9.08582e-06		D	0.999995	0.001151	0.001698	X
E	7.70254e-06	6.94056e-06	9.47228e-06		E	0.513019	0.00104	0.001	0.999985	X
Maxilla
Module	Mean Rates	LCI	UCI		Modules	A	B	C	D	E
A	2.15153e-05	1.94964e-05	2.65432e-05		A	X
B	1.35411e-05	1.22264e-05	1.66735e-05		B	0.001519	X
C	1.64244e-05	1.48669e-05	2.02524e-05		C	0.672891	0.939395	X
D	1.8755e-05	1.69209e-05	2.30378e-05		D	0.895584	0.585496	0.275846	X
E	1.91157e-05	1.7252e-05	2.3492e-05		E	0.998294	0.598877	1	1	X
Pre-Maxilla
Module	Mean Rates	LCI	UCI		Modules	A	B	C	D
A	6.18005e-05	5.56181e-05	7.57801e-05		A	X
B	2.18457e-05	1.96927e-05	2.67843e-05		B	0.001	X
C	2.21889e-05	2.00687e-05	2.72423e-05		C	0.001	0.999122	X
D	2.98537e-05	2.6796e-05	3.66589e-05		D	0.21984	0.999987	0.994506	X

## Sheet: TableS8
Individual	Treatment	centroid size	PC1	PC2	PC3	PC4	PC5
Ben01_OJ	B	12263	-0.00860158	0.00757801	-0.0107955	0.00457638	-0.0030927
Ben02_OJ	B	17589.1	0.00533916	-0.0053504	-0.0265397	0.0117575	0.00687
Ben03_OJ	B	16305.7	0.0151941	0.00946211	-0.000437063	0.00831512	-0.00744787
Ben04_OJ	B	13830	0.0136978	-0.00772439	-0.00387506	-0.00940853	0.00208903
Ben05_OJ	B	18271.5	-0.0064968	-0.0138915	0.00649251	-0.00565127	0.0106813
Ben06_OJ	B	15890.5	0.0227087	-0.0084397	0.0046193	-0.00149185	-0.010632
Ben07_OJ	B	17864	-0.010495	-0.011375	0.0128977	-0.0143308	-0.00657482
Ben08_OJ	B	13237.8	-0.00973297	0.00635967	0.00853312	0.016712	-0.0211503
Ben09_OJ	B	15302.4	0.0104871	0.00769066	-0.0115898	0.0109795	-0.00543135
Ben10_OJ	B	16189	0.0188211	0.00881664	-0.0157749	-0.000398399	0.0075872
Ben11_OJ	B	15774.5	-0.0246864	0.0334151	0.0147516	0.00225735	0.0303439
Ben12_OJ	B	16038.2	-0.00419045	0.00301701	-0.0147859	-0.00793459	0.00116686
Ben13_OJ	B	17388.5	-0.012098	0.0174593	-0.00526001	0.00133801	-0.00539753
Ben14_OJ	B	18069.6	-0.0104519	-0.0104974	-0.0233493	-0.00625439	-0.0155306
Ben15_OJ	B	12736.6	-0.00939192	0.012138	-0.0191711	-0.00199933	6.95e-06
Ben16_OJ	B	12654.5	0.0117694	-0.0237069	0.0021232	0.00388388	0.00473667
Ben17_OJ	B	15082.9	0.00641151	-0.0015522	0.0117884	0.011277	0.00195876
Ben18_OJ	B	11448.2	0.0157711	-0.00685821	-0.00487342	0.00154813	-0.000355043
Ben19_OJ	B	14453.6	-0.00314024	0.00792324	0.00323111	0.0324779	0.00042711
Lim01_OJ	L	14924.9	0.00692928	-0.0038768	0.0147247	0.00228377	-0.00814465
Lim02_OJ	L	12848.7	-0.00218778	-0.000836793	-0.00472447	-0.00999367	0.0121662
Lim03_OJ	L	12176.3	0.00289566	0.0099672	-0.00322131	-0.0139201	-0.00363176
Lim04_OJ	L	16430.5	-0.0171242	-0.0120012	0.00517574	-0.00737376	-0.00423501
Lim05_OJ	L	13330.4	-0.00172502	-0.00076815	-0.0197182	-0.00173072	0.0107204
Lim06_OJ	L	15352.9	0.00349396	0.00117409	0.0223562	0.00275713	-0.00949929
Lim07_OJ	L	12274.2	0.00908495	0.0187672	0.00541977	-0.0202204	-0.0010515
Lim08_OJ	L	12309.7	-0.0262849	-0.013491	0.00632552	0.0125031	-0.00880549
Lim09_OJ	L	15246.5	0.0307652	0.00813554	0.00285116	-0.0123547	0.000809699
Lim10_OJ	L	13052.3	0.014264	-0.00788888	0.0109507	0.000210373	0.00289107
Lim11_OJ	L	11244.1	-0.0127627	-0.00615669	-0.00508465	-0.0142548	-0.0035156
Lim12_OJ	L	15680.6	-0.0269514	0.00632187	0.0121764	-0.0168781	-0.00792296
Lim13_OJ	L	14675.1	0.0258908	-0.00365836	0.0207551	-0.00110377	0.0109711
Lim14_OJ	L	12480.7	0.00249481	0.0115869	-0.00434988	0.00702443	-0.0124529
Lim15_OJ	L	12377.5	-0.0171339	-0.019887	0.00136501	-0.00368076	0.00350552
Lim16_OJ	L	14129.2	-0.00996865	-0.0320938	-0.00115753	0.0123659	0.0213854
Lim17_OJ	L	12976.1	-0.00259477	0.0202418	0.0081707	0.00671237	0.00655411
Ben01_PJ	B	7366.36	-0.00465577	0.00664223	-0.00670577	0.012109	-0.005807
Ben02_PJ	B	10259.4	0.00499526	0.0127425	0.0136729	-0.000172086	-0.00735969
Ben03_PJ	B	9817.06	-0.00107628	0.00202236	-0.0117092	-0.00558092	0.00403051
Ben05_PJ	B	10557.1	-0.0153425	-0.00238507	-0.0177197	0.00310458	-0.00148118
Ben06_PJ	B	9231.77	-0.0066204	0.00641412	-0.0153751	-0.00559106	-0.00392034
Ben07_PJ	B	10180.4	-0.0189276	-0.00394049	-0.0170385	0.00121361	0.0209234
Ben08_PJ	B	7892.01	0.0167707	-0.0103718	-0.00821719	0.00805197	0.0121893
Ben10_PJ	B	9806.26	0.0364775	-0.0114684	0.00277296	0.00214118	-0.0033534
Ben11_PJ	B	9561.4	0.00933445	0.0180048	0.0124902	0.00930054	0.00276412
Ben12_PJ	B	9180.28	-0.00277664	-0.000220375	-0.0149062	0.0150424	0.00745363
Ben13_PJ	B	10209.3	-0.0033848	-0.00706575	0.00342019	0.00286996	-0.0094575
Ben14_PJ	B	10436.8	-0.000559205	0.014772	-0.00222897	-0.0103404	-0.0160956
Ben15A_PJ	B	7281.48	0.00500637	0.0179185	-0.00815559	-0.00451534	0.00401885
Ben15B_PJ	B	8690.87	0.0181882	0.00889063	-0.00132315	0.0206813	0.00338614
Ben16_PJ	B	7455.43	0.00880205	0.0324478	0.000146611	-0.00225642	0.000387644
Ben17_PJ	B	9079.35	0.000352451	-0.00252094	0.00294158	-0.00012251	0.00424262
Ben18_PJ	B	6646.08	-0.00400954	0.00512381	-0.0113771	0.00575848	-0.00463722
Lim01_PJ	L	8617.56	-0.00510767	-0.00536934	0.0114718	-0.00192545	0.00186005
Lim02_PJ	L	7421.37	0.0088199	-0.00497379	-0.00126868	-0.0119032	0.0121959
Lim03_PJ	L	7350.75	0.0126675	-0.0252306	-0.0248555	-0.0105036	-0.0239761
Lim04_PJ	L	9342.72	-0.00992434	-0.0187996	0.0193996	-0.0184735	-0.001776
Lim05_PJ	L	7328.73	-0.0110248	0.000449989	-0.00441898	-0.0108172	-0.0056505
Lim06_PJ	L	8394.56	-0.036129	-0.00101823	0.00807074	0.000846123	0.00235957
Lim08_PJ	L	7330.68	-0.000434242	-0.022229	0.0107787	0.02675	-0.00979416
Lim10_PJ	L	7503.41	0.00359873	-0.0121418	0.0141819	-0.00386002	0.00628348
Lim11_PJ	L	6406.13	-0.00978554	0.0209896	0.008016	-0.00543186	-0.00563927
Lim12_PJ	L	8954.27	-0.00465601	0.00280743	0.0141444	0.00250846	-0.0165885
Lim13_PJ	L	8897.76	0.0179095	-0.000916968	0.0141222	-0.0102839	0.0123762
Lim14_PJ	L	7296.73	-0.0163911	-0.00740043	0.0109813	0.0125039	0.00382054
Lim15_PJ	L	7336.02	0.0137352	-0.000955376	-0.00331519	-0.0139966	0.00620686
Lim17_PJ	L	7475.1	-0.00585236	-0.0122178	0.00200371	-0.00710723	0.0110376
Ben01_Mx	B	7213.37	-0.014196	0.00622841	-0.0210543	0.000741153	-0.00493026
Ben02_Mx	B	10928.7	-0.0246484	0.00984986	-0.00805874	0.00689916	-0.000855451
Ben03_Mx	B	9996.77	0.00138278	0.0064	0.00309617	0.0148417	0.0146043
Ben04_Mx	B	8255.57	-0.00648221	0.0264389	-0.00894539	0.00132172	-0.0104814
Ben05_Mx	B	11526.8	0.0131843	-0.00591811	-0.00495313	-0.00683737	-0.00108906
Ben06_Mx	B	9766.8	-0.00889524	0.00257122	0.00457088	0.00492028	-0.00576678
Ben07_Mx	B	11057.2	0.0190409	0.00227916	-0.00153002	0.00342471	-0.00333348
Ben08_Mx	B	7870.45	-0.00887349	-0.000745423	-0.0100893	0.00676372	0.00667696
Ben09_Mx	B	9024.72	-0.00439656	0.0213227	0.00362309	-0.0136038	-0.000494279
Ben10_Mx	B	9799.79	0.0103597	0.00597666	-0.00220723	0.00268502	0.000898981
Ben11_Mx	B	9519.91	-0.0276177	0.0038012	-0.00127556	-0.0255995	0.0113968
Ben12_Mx	B	9550.07	-0.000854741	-0.00223052	-0.0010812	-0.00743051	0.00298102
Ben13_Mx	B	10721.6	-0.000114676	0.000237635	0.00871773	-0.000749168	0.0100341
Ben14_Mx	B	11536.3	-0.00894998	-0.00463692	0.00515161	0.0103338	-0.00551143
Ben15_Mx	B	7413.21	-0.0158283	0.00848557	-0.0147412	0.00288854	0.00955715
Ben16_Mx	B	7489.78	0.00147377	0.0192528	0.0153204	0.00737885	-0.00356198
Ben17_Mx	B	9090.2	0.0159432	-0.0022864	0.00641528	0.00640197	0.00647162
Ben18_Mx	B	6602.33	0.013956	0.0083115	0.00664505	0.0128745	0.00213749
Ben19_Mx	B	8722.39	-0.0262631	0.00722183	0.0159339	-0.00648413	-0.00641615
Lim01_Mx	L	8918.47	0.000542615	-0.0114335	-0.0114606	0.00467337	0.0112835
Lim02_Mx	L	7631.72	-0.0161284	-0.0110613	-0.00343615	-0.0160618	-0.00704735
Lim03_Mx	L	7271.8	-0.00299552	-0.00568277	-0.00774107	0.0112602	0.0112233
Lim04_Mx	L	9869.22	0.00218469	-0.0185894	-0.00612486	0.00467745	-0.00454212
Lim05_Mx	L	7709.07	-1.01e-05	-0.00335407	0.0292076	0.00307037	0.0145021
Lim06_Mx	L	9264.26	0.0192657	-0.0117887	-0.0119599	-0.0189166	-0.000346211
Lim07_Mx	L	7019.06	0.0200873	-0.00622872	0.00842427	-0.0126201	-0.0116016
Lim08_Mx	L	7542.33	0.0264247	-0.00164459	-0.00652655	-0.0038183	0.0105616
Lim09_Mx	L	8844.29	0.0143351	0.00288478	-0.00403267	0.00230075	0.00500745
Lim10_Mx	L	7532.41	0.00752076	0.00406092	0.00925775	-0.0116188	0.00649296
Lim11_Mx	L	6624.51	-0.00182576	0.0133686	-0.00611612	-0.000503225	-0.00321242
Lim12_Mx	L	9594.03	0.0111033	0.00623899	0.00488982	-0.00137871	-0.0144678
Lim13_Mx	L	8494.58	0.0259857	-0.000257824	-0.00569077	0.00350328	-0.0156793
Lim14_Mx	L	7488.22	0.00631253	-0.0123428	0.00112139	-0.0121671	0.00262928
Lim15_Mx	L	7697.79	-0.0218487	-0.0436691	0.00862174	0.0037524	-0.00544152
Lim16_Mx	L	8488.32	-0.0102547	0.00119108	0.0122184	0.00393807	-0.0123418
Lim17_Mx	L	7703.58	-0.00891941	-0.0142518	-0.00619047	0.0191381	-0.00933847
Ben01_PM	B	5357.32	-0.0469215	0.0151845	-0.00858683	0.010605	-0.00686805
Ben02_PM	B	7928.07	-0.0204165	0.00870153	-0.0214502	-0.00937352	0.00274573
Ben03_PM	B	7362.51	0.0130545	0.00460115	-0.0037266	-0.0042277	0.000403571
Ben04_PM	B	5964.41	-0.0037795	-0.00696137	0.0226973	-0.00923955	0.00535745
Ben05_PM	B	8580.58	-0.00867629	0.00325821	0.0021659	0.0128361	-0.011475
Ben06_PM	B	7051.18	-0.000870621	0.00106424	0.00832959	-0.000581178	-0.0041629
Ben07_PM	B	8080.32	-0.0064815	1.61e-05	-0.0149692	-0.0057225	0.0118629
Ben08_PM	B	5842.24	0.0143528	0.0126271	0.0134968	-0.00481246	-0.00857308
Ben09_PM	B	6711.06	-0.000551065	0.0185153	0.00163718	0.0194209	0.00338622
Ben10_PM	B	7152.68	-0.0107563	-0.0124757	0.00964663	0.00298025	-0.00186849
Ben11_PM	B	6975.26	0.00576284	-0.014378	0.0190028	0.00273309	0.011719
Ben12_PM	B	7030.41	0.00268809	0.0016069	0.0111928	0.00340346	0.00835448
Ben13_PM	B	7820.97	0.000249181	0.00388076	-0.00129119	0.0116903	-0.00113689
Ben14_PM	B	8166.19	-0.00350884	0.00727266	0.00499349	-0.00935595	-0.000241192
Ben15_PM	B	5583.8	0.0291231	0.0111599	-0.00212302	0.0259413	0.0176475
Ben16_PM	B	5550.59	0.0114369	-0.00289538	-0.00357048	0.00864449	-0.00343918
Ben17_PM	B	6537.7	0.00136745	-0.00439637	0.0220294	0.0174936	-0.00130994
Ben18_PM	B	4853.45	0.0241938	0.036899	0.00554274	0.00502177	-0.00321884
Ben19_PM	B	6491.03	-0.00988062	-0.00451857	0.0131168	-0.00206066	0.0079177
Lim01_PM	L	6428.32	0.0126697	0.00298618	-0.00537779	0.00108533	-0.0278842
Lim02_PM	L	5506.72	-0.00222939	0.00250999	0.0178222	-0.00973298	-0.00104427
Lim03_PM	L	5067.07	-0.00593604	0.0205599	0.00566092	-0.0267782	-0.00198111
Lim04_PM	L	7197.05	0.00981735	0.00945681	-0.00606077	-0.012975	-0.0051043
Lim05_PM	L	5571.45	-0.0092305	0.00125308	0.0146158	-0.0187108	0.0159397
Lim06_PM	L	6732.32	0.0152102	-0.00704574	0.0101352	0.000438501	-0.00905271
Lim07_PM	L	5042.45	-0.0181399	-0.0250175	0.0118952	0.00434649	-0.00357456
Lim08_PM	L	5573.89	0.00682841	-0.0271949	-0.0256357	0.000530399	0.0164702
Lim09_PM	L	6289.2	0.0306251	-0.0265603	-0.0148088	-0.0155916	-0.007836
Lim10_PM	L	5487.02	0.00716531	-0.0238193	-0.00281508	-0.000946339	0.00976516
Lim11_PM	L	4844.25	0.0169318	0.0145121	-0.0233935	0.0131081	0.0015311
Lim12_PM	L	6956.96	0.0281395	0.00509381	-0.0263586	-0.00411518	0.00658621
Lim13_PM	L	6060.63	-0.00553294	-0.0193633	-0.00632235	0.00821085	-0.0096063
Lim14_PM	L	5445.44	0.00940226	-0.0225829	0.00302411	0.00658777	-0.0119226
Lim15_PM	L	5592.45	-0.0654374	-0.00482886	-0.0179041	0.00901349	-0.00149657
Lim16_PM	L	6187.83	-0.0172116	0.0209626	0.00106996	-0.0078748	0.0113486
Lim17_PM	L	5508.72	-0.00345783	-8.33e-05	-0.0136805	-0.0219927	-0.00923925

## Sheet: TableS9
Experimental Populations
Mandible
Limnetic/Deep									Benthic/Shallow
Partitions	MaxL	K	n	AICc	dAICc	Model_L	Post_Prob		Partitions	MaxL	K	n	AICc	dAICc	Model_L	Post_Prob
ComplexFunctionII.sep.Mod + same.between	6595.86	8	5886	-13175.7	0	1	0.965396		ComplexFunctionII.same.Mod + sep.between	7011.31	17	5886	-13988.5	0	1	0.748992
ComplexFunctionII.sep.Mod + sep.between	6606.6	22	5886	-13169	6.66992	0.0356161	0.0343836		ComplexFunctionII.sep.Mod + sep.between	7014.56	22	5886	-13984.9	3.57125	0.167693	0.1256
ComplexFunctionII.same.Mod + same.between	6582.43	3	5886	-13158.9	16.8415	0.000220245	0.000212624		ComplexFunctionII.same.Mod + same.between	6995.31	3	5886	-13984.6	3.89502	0.142629	0.106828
ComplexFunctionII.same.Mod + sep.between	6593.17	17	5886	-13152.2	23.4636	8.03e-06	7.76e-06		ComplexFunctionII.sep.Mod + same.between	6998.56	8	5886	-13981.1	7.41838	0.0244974	0.0183483
QuandrateFunction.sep.Mod + same.between	6576.12	7	5886	-13138.2	37.4793	7.27e-09	7.02e-09		QuadrateFunction.sep.Mod + sep.between	7002.22	16	5886	-13972.3	16.1775	0.000306969	0.000229917
QuandrateFunction.same.Mod + same.between	6571	3	5886	-13136	39.7032	2.39e-09	2.31e-09		QuadrateFunction.sep.Mod + same.between	6988.49	7	5886	-13963	25.5538	2.83e-06	2.12e-06
ComplexFunction.sep.Mod + same.between	6572.5	7	5886	-13131	44.7219	1.94e-10	1.88e-10		JointFunction.sep.Mod + same.between	6983.03	6	5886	-13954	34.481	3.25e-08	2.44e-08
ComplexFunction.sep.Mod + sep.between	6578.93	16	5886	-13125.8	49.9209	1.44e-11	1.39e-11		QuadrateFunction.same.Mod + sep.between	6987.95	12	5886	-13951.9	36.6653	1.09e-08	8.18e-09
QuandrateFunction.sep.Mod + sep.between	6577.74	16	5886	-13123.4	52.3064	4.38e-12	4.23e-12		JointFunction.sep.Mod + sep.between	6986.73	11	5886	-13951.4	37.1044	8.77e-09	6.57e-09
QuandrateFunction.same.Mod + sep.between	6572.62	12	5886	-13121.2	54.5057	1.46e-12	1.41e-12		QuadrateFunction.same.Mod + same.between	6974.23	3	5886	-13942.5	46.0661	9.93e-11	7.44e-11
JointFunction.sep.Mod + same.between	6565.01	6	5886	-13118	57.6917	2.97e-13	2.86e-13		ComplexFunction.sep.Mod + sep.between	6981.38	16	5886	-13930.7	57.8546	2.74e-13	2.05e-13
JointFunction.sep.Mod + sep.between	6566.27	11	5886	-13110.5	65.2066	6.93e-15	6.69e-15		ComplexFunction.sep.Mod + same.between	6970.86	7	5886	-13927.7	60.8131	6.23e-14	4.67e-14
ComplexFunction.same.Mod + same.between	6555.21	3	5886	-13104.4	71.2693	3.34e-16	3.23e-16		ComplexFunction.same.Mod + sep.between	6973.09	12	5886	-13922.1	66.3891	3.84e-15	2.87e-15
ComplexFunction.same.Mod + sep.between	6561.65	12	5886	-13099.2	76.4437	2.51e-17	2.43e-17		ComplexFunction.same.Mod + same.between	6962.58	3	5886	-13919.1	69.3722	8.63e-16	6.46e-16
JointFunction.same.Mod + same.between	6550.33	3	5886	-13094.7	81.0311	2.54e-18	2.45e-18		JointFunction.same.Mod + same.between	6960.74	3	5886	-13915.5	73.0471	1.37e-16	1.03e-16
JointFunction.same.Mod + sep.between	6551.59	8	5886	-13087.2	88.5358	5.95e-20	5.75e-20		JointFunction.same.Mod + sep.between	6964.44	8	5886	-13912.9	75.6603	3.72e-17	2.79e-17
SimpleFunction.sep.Mod + same.between	6537.95	5	5886	-13065.9	109.795	1.44e-24	1.39e-24		SimpleFunction.sep.Mod + same.between	6951.19	5	5886	-13892.4	96.1547	1.32e-21	9.88e-22
SimpleFunction.sep.Mod + same.between	6537.95	5	5886	-13065.9	109.795	1.44e-24	1.39e-24		SimpleFunction.sep.Mod + same.between	6951.19	5	5886	-13892.4	96.1547	1.32e-21	9.88e-22
SimpleFunction.sep.Mod + sep.between	6538.52	7	5886	-13063	112.663	3.43e-25	3.31e-25		SimpleFunction.sep.Mod + sep.between	6952.15	7	5886	-13890.3	98.2459	4.64e-22	3.47e-22
SimpleFunction.sep.Mod + sep.between	6538.52	7	5886	-13063	112.663	3.43e-25	3.31e-25		SimpleFunction.sep.Mod + sep.between	6952.15	7	5886	-13890.3	98.2459	4.64e-22	3.47e-22
SimpleFunction.same.Mod + same.between	6517.83	3	5886	-13029.7	146.038	1.94e-32	1.87e-32		SimpleFunction.same.Mod + same.between	6930.3	3	5886	-13854.6	133.933	8.26e-30	6.18e-30
SimpleFunction.same.Mod + same.between	6517.83	3	5886	-13029.7	146.038	1.94e-32	1.87e-32		SimpleFunction.same.Mod + same.between	6930.3	3	5886	-13854.6	133.933	8.26e-30	6.18e-30
SimpleFunction.same.Mod + sep.between	6518.4	5	5886	-13026.8	148.904	4.63e-33	4.47e-33		SimpleFunction.same.Mod + sep.between	6931.25	5	5886	-13852.5	136.022	2.91e-30	2.18e-30
SimpleFunction.same.Mod + sep.between	6518.4	5	5886	-13026.8	148.904	4.63e-33	4.47e-33		SimpleFunction.same.Mod + sep.between	6931.25	5	5886	-13852.5	136.022	2.91e-30	2.18e-30
ArticularFunction.sep.Mod + same.between	6509.99	6	5886	-13008	167.725	3.79e-37	3.66e-37		ArticularFunction.sep.Mod + sep.between	6936.55	11	5886	-13851.1	137.469	1.41e-30	1.06e-30
ArticularFunction.sep.Mod + same.between	6509.99	6	5886	-13008	167.725	3.79e-37	3.66e-37		ArticularFunction.sep.Mod + sep.between	6936.55	11	5886	-13851.1	137.469	1.41e-30	1.06e-30
ArticularFunction.sep.Mod + sep.between	6512.75	11	5886	-13003.5	172.236	3.97e-38	3.84e-38		ArticularFunction.sep.Mod + same.between	6930.67	6	5886	-13849.3	139.202	5.92e-31	4.44e-31
ArticularFunction.sep.Mod + sep.between	6512.75	11	5886	-13003.5	172.236	3.97e-38	3.84e-38		ArticularFunction.sep.Mod + same.between	6930.67	6	5886	-13849.3	139.202	5.92e-31	4.44e-31
ArticularFunction.same.Mod + same.between	6497.33	3	5886	-12988.7	187.039	2.43e-41	2.34e-41		ArticularFunction.same.Mod + sep.between	6931.97	8	5886	-13847.9	140.6	2.95e-31	2.21e-31
ArticularFunction.same.Mod + same.between	6497.33	3	5886	-12988.7	187.039	2.43e-41	2.34e-41		ArticularFunction.same.Mod + sep.between	6931.97	8	5886	-13847.9	140.6	2.95e-31	2.21e-31
AntPos.sep.Mod + same.between	6496.95	4	5886	-12985.9	189.796	6.11e-42	5.9e-42		ArticularFunction.same.Mod + same.between	6926.09	3	5886	-13846.2	142.343	1.23e-31	9.23e-32
ArticularFunction.same.Mod + sep.between	6500.09	8	5886	-12984.2	191.539	2.56e-42	2.47e-42		ArticularFunction.same.Mod + same.between	6926.09	3	5886	-13846.2	142.343	1.23e-31	9.23e-32
ArticularFunction.same.Mod + sep.between	6500.09	8	5886	-12984.2	191.539	2.56e-42	2.47e-42		AntPos.sep.Mod + same.between	6919.88	4	5886	-13831.8	156.76	9.12e-35	6.83e-35
AntPos.same.Mod + same.between	6494.17	3	5886	-12982.3	193.364	1.03e-42	9.91e-43		AntPos.same.Mod + same.between	6915.11	3	5886	-13824.2	164.304	2.1e-36	1.57e-36
No.modules.default	6458.39	2	5886	-12912.8	262.91	8.13e-58	7.84e-58		No.modules.default	6890.41	2	5886	-13776.8	211.709	1.07e-46	7.99e-47
Pharyngeal jaw
Limnetic/Deep									Benthic/Shallow
Partitions	MaxL	K	n	AICc	dAICc	Model_L	Post_Prob		Partitions	MaxL	K	n	AICc	dAICc	Model_L	Post_Prob
MuscleSplit.sep.Mod + same.between	888.481	7	990	-1762.85	0	1	0.992728		MuscleSplit.sep.Mod + sep.between	926.335	16	990	-1820.11	0	1	0.828332
MuscleSplit.sep.Mod + sep.between	892.781	16	990	-1753	9.84539	0.00727948	0.00722655		MuscleSplit.sep.Mod + same.between	915.427	7	990	-1816.74	3.37071	0.185379	0.153555
MuscleSplit.same.Mod + same.between	874.359	3	990	-1742.69	20.1543	4.2e-05	4.17e-05		Muscle.sep.Mod + same.between	912.052	6	990	-1812.02	8.09261	0.0174869	0.014485
Muscle.sep.Mod + same.between	874.175	6	990	-1736.27	26.583	1.69e-06	1.68e-06		Muscle.same.Mod + same.between	906.881	3	990	-1807.74	12.3741	0.00205583	0.00170291
Muscle.same.Mod + same.between	870.796	3	990	-1735.57	27.2813	1.19e-06	1.18e-06		Muscle.sep.Mod + sep.between	914.716	11	990	-1807.16	12.9499	0.00154156	0.00127693
MuscleSplit.same.Mod + sep.between	878.659	12	990	-1733	29.8496	3.3e-07	3.27e-07		MuscleSplit.same.Mod + sep.between	914.623	12	990	-1804.93	15.1846	0.000504317	0.000417742
Muscle.sep.Mod + sep.between	875.151	11	990	-1728.03	34.8154	2.75e-08	2.73e-08		Muscle.same.Mod + sep.between	909.544	8	990	-1802.94	17.1694	0.000186942	0.00015485
Muscle.same.Mod + sep.between	871.772	8	990	-1727.4	35.4516	2e-08	1.99e-08		MuscleSplit.same.Mod + same.between	903.715	3	990	-1801.41	18.7054	8.67e-05	7.18e-05
Wings.same.Mod + same.between	863.134	3	990	-1720.24	42.6041	5.61e-10	5.57e-10		Wings.sep.Mod + same.between	902.116	5	990	-1794.17	25.9412	2.33e-06	1.93e-06
Wings.sep.Mod + same.between	864.078	5	990	-1718.1	44.7527	1.91e-10	1.9e-10		Wings.sep.Mod + sep.between	903.554	7	990	-1792.99	27.1174	1.29e-06	1.07e-06
Wings.same.Mod + sep.between	863.173	5	990	-1716.29	46.5628	7.74e-11	7.69e-11		Wings.same.Mod + same.between	895.239	3	990	-1784.45	35.6576	1.81e-08	1.5e-08
Wings.sep.Mod + sep.between	864.117	7	990	-1714.12	48.7279	2.62e-11	2.6e-11		Wings.same.Mod + sep.between	896.678	5	990	-1783.29	36.8173	1.01e-08	8.38e-09
DorVen.sep.Mod + same.between	854.609	4	990	-1701.18	61.6717	4.06e-14	4.03e-14		DorVen.sep.Mod + same.between	886.532	4	990	-1765.02	55.0872	1.09e-12	9.04e-13
DorVen.same.Mod + same.between	851.152	3	990	-1696.28	66.5691	3.51e-15	3.48e-15		DorVen.same.Mod + same.between	885.14	3	990	-1764.26	55.8561	7.43e-13	6.15e-13
AntPos.sep.Mod + same.between	845.423	4	990	-1682.8	80.044	4.16e-18	4.13e-18		AntPos.sep.Mod + same.between	866.105	4	990	-1724.17	95.9427	1.47e-21	1.21e-21
AntPos.same.Mod + same.between	844.006	3	990	-1681.99	80.86	2.76e-18	2.74e-18		AntPos.same.Mod + same.between	861.384	3	990	-1716.74	103.368	3.58e-23	2.97e-23
No.modules.default	833.826	2	990	-1663.64	99.2094	2.86e-22	2.84e-22		No.modules.default	853.606	2	990	-1703.2	116.911	4.1e-26	3.4e-26
Maxilla
Limnetic/Deep									Benthic/Shallow
Partitions	MaxL	K	n	AICc	dAICc	Model_L	Post_Prob		Partitions	MaxL	K	n	AICc	dAICc	Model_L	Post_Prob
FunctionMxTip.same.Mod + same.between	1078.3	3	946	-2150.58	0	1	0.943303		Function.same.Mod + same.between	1135.23	3	946	-2264.43	0	1	0.75947
Function.same.Mod + same.between	1075.04	3	946	-2144.05	6.53922	0.0380213	0.0358656		FunctionMxTip.same.Mod + same.between	1133.97	3	946	-2261.91	2.51264	0.2847	0.216221
FunctionMxTip.sep.Mod + same.between	1079.46	8	946	-2142.77	7.80934	0.0201476	0.0190053		Function.sep.Mod + same.between	1135.54	7	946	-2256.97	7.46013	0.0239913	0.0182206
Function.sep.Mod + same.between	1075.78	7	946	-2137.45	13.1359	0.0014047	0.00132505		FunctionMxTip.sep.Mod + same.between	1135.24	8	946	-2254.32	10.1024	0.00640176	0.00486195
BigA1Muscle.same.Mod + same.between	1070.16	3	946	-2134.29	16.2944	0.000289546	0.000273129		BigA1Muscle.same.Mod + same.between	1127.86	3	946	-2249.69	14.7317	0.000632472	0.000480344
FunctionMxTip.same.Mod + sep.between	1083.36	17	946	-2132.06	18.5268	9.48e-05	8.95e-05		Function.same.Mod + sep.between	1136.71	12	946	-2249.09	15.3362	0.00046751	0.00035506
BigA1Muscle.sep.Mod + same.between	1071.85	6	946	-2131.61	18.9713	7.59e-05	7.16e-05		InterMxLigament.same.Mod + same.between	1126.87	3	946	-2247.72	16.7065	0.000235631	0.000178955
InterMxLigament.same.Mod + same.between	1067.98	3	946	-2129.94	20.6459	3.29e-05	3.1e-05		BigA1Muscle.sep.Mod + same.between	1129.01	6	946	-2245.94	18.4854	9.68e-05	7.35e-05
Function.same.Mod + sep.between	1076.04	12	946	-2127.75	22.8386	1.1e-05	1.04e-05		InterMxLigament.sep.Mod + same.between	1127.63	5	946	-2245.21	19.2197	6.71e-05	5.09e-05
InterMxLigament.sep.Mod + same.between	1068.56	5	946	-2127.06	23.5233	7.8e-06	7.36e-06		InterMxLigament.same.Mod + sep.between	1127.13	5	946	-2244.19	20.2388	4.03e-05	3.06e-05
InterMxLigament.same.Mod + sep.between	1068.18	5	946	-2126.3	24.2795	5.34e-06	5.04e-06		AntPos.same.Mod + same.between	1124.46	3	946	-2242.89	21.5333	2.11e-05	1.6e-05
AntPos.same.Mod + same.between	1065.84	3	946	-2125.65	24.9366	3.85e-06	3.63e-06		AntPos.sep.Mod + same.between	1124.87	4	946	-2241.69	22.7363	1.16e-05	8.78e-06
BigA1Muscle.same.Mod + sep.between	1070.49	8	946	-2124.83	25.7535	2.56e-06	2.41e-06		InterMxLigament.sep.Mod + sep.between	1127.89	7	946	-2241.66	22.7692	1.14e-05	8.63e-06
AntPos.sep.Mod + same.between	1066.27	4	946	-2124.49	26.0967	2.15e-06	2.03e-06		Function.sep.Mod + sep.between	1137.03	16	946	-2241.47	22.9536	1.04e-05	7.87e-06
FunctionMxTip.sep.Mod + sep.between	1084.52	22	946	-2123.94	26.6449	1.64e-06	1.54e-06		FunctionMxTip.same.Mod + sep.between	1137.69	17	946	-2240.73	23.6983	7.14e-06	5.43e-06
InterMxLigament.sep.Mod + sep.between	1068.76	7	946	-2123.41	27.1741	1.26e-06	1.19e-06		BigA1Muscle.same.Mod + sep.between	1128.37	8	946	-2240.59	23.8388	6.66e-06	5.06e-06
DorVen.same.Mod + same.between	1064.06	3	946	-2122.09	28.4912	6.5e-07	6.14e-07		DorVen.sep.Mod + same.between	1123.3	4	946	-2238.56	25.8676	2.41e-06	1.83e-06
BigA1Muscle.sep.Mod + sep.between	1072.19	11	946	-2122.09	28.4954	6.49e-07	6.12e-07		DorVen.same.Mod + same.between	1122.15	3	946	-2238.28	26.1425	2.1e-06	1.6e-06
DorVen.sep.Mod + same.between	1064.62	4	946	-2121.2	29.3855	4.16e-07	3.92e-07		BigA1Muscle.sep.Mod + sep.between	1129.53	11	946	-2236.77	27.6574	9.87e-07	7.5e-07
Function.sep.Mod + sep.between	1076.79	16	946	-2120.99	29.5925	3.75e-07	3.54e-07		FunctionMxTip.sep.Mod + sep.between	1138.96	22	946	-2232.83	31.5968	1.38e-07	1.05e-07
No.modules.default	1060.66	2	946	-2117.32	33.2691	5.97e-08	5.63e-08		No.modules.default	1118.37	2	946	-2232.73	31.6929	1.31e-07	9.96e-08
Pre-Maxilla
Limnetic/Deep									Benthic/Shallow
Partitions	MaxL	K	n	AICc	dAICc	Model_L	Post_Prob		Partitions	MaxL	K	n	AICc	dAICc	Model_L	Post_Prob
MxConnect.same.Mod + same.between	295.403	3	300	-584.725	0	1	0.631534		MxConnect.sep.Mod + same.between	299.067	6	300	-585.847	0	1	0.324811
Tooth.same.Mod + same.between	294.396	3	300	-582.712	2.0129	0.365514	0.230834		MxConnect.same.Mod + same.between	295.791	3	300	-585.501	0.346808	0.840798	0.273101
MxConnect.sep.Mod + same.between	296.046	6	300	-579.805	4.91995	0.0854371	0.0539564		MxConnect.sep.Mod + sep.between	303.923	11	300	-584.93	0.917976	0.631923	0.205256
Tooth.sep.Mod + same.between	294.568	5	300	-578.932	5.7924	0.0552326	0.0348812		MxConnect.same.Mod + sep.between	300.647	8	300	-584.799	1.04857	0.591978	0.192281
Tooth.same.Mod + sep.between	294.463	5	300	-578.721	6.00316	0.0497085	0.0313926		Tooth.same.Mod + same.between	291.385	3	300	-576.689	9.15829	0.0102636	0.00333375
MxConnect.same.Mod + sep.between	296.634	8	300	-576.774	7.95069	0.0187729	0.0118557		Tooth.sep.Mod + same.between	291.681	5	300	-573.158	12.6891	0.00175627	0.000570455
Tooth.sep.Mod + sep.between	294.634	7	300	-574.885	9.83914	0.00730226	0.00461163		Tooth.same.Mod + sep.between	291.629	5	300	-573.053	12.7943	0.00166633	0.000541243
MxConnect.sep.Mod + sep.between	297.277	11	300	-571.638	13.0869	0.00143955	0.000909124		Tooth.sep.Mod + sep.between	291.925	7	300	-569.466	16.3816	0.000277195	9e-05
DorVen.same.Mod + same.between	284.898	3	300	-563.716	21.0089	2.74e-05	1.73e-05		DorVen.sep.Mod + same.between	286.047	4	300	-563.959	21.8882	1.77e-05	5.74e-06
DorVen.sep.Mod + same.between	285.113	4	300	-562.09	22.6342	1.22e-05	7.68e-06		DorVen.same.Mod + same.between	284.796	3	300	-563.512	22.3359	1.41e-05	4.59e-06
AntPos.same.Mod + same.between	280.736	3	300	-555.39	29.3346	4.27e-07	2.69e-07		AntPos.same.Mod + same.between	284.388	3	300	-562.694	23.1534	9.38e-06	3.05e-06
AntPos.sep.Mod + same.between	280.797	4	300	-553.459	31.2652	1.62e-07	1.03e-07		AntPos.sep.Mod + same.between	285.311	4	300	-562.487	23.3603	8.46e-06	2.75e-06
No.modules.default	276.82	2	300	-549.599	35.1258	2.36e-08	1.49e-08		No.modules.default	276.656	2	300	-549.271	36.5761	1.14e-08	3.71e-09

## Sheet: TableS10
Experimental Populations
Maxilla
Module	Depth	Disparity (PV)	P	Integration (Ro)
Full	Deep	0.00104	0.762	0.27
	Shallow	0.001		0.25
A	Deep	0.000175435	0.879	0.26
	Shallow	0.000171131		0.26
B	Deep	0.000101647	0.703	0.3
	Shallow	9.30424e-05		0.24
C	Deep	0.000153043	0.632	0.27
	Shallow	0.000168072		0.24
D	Deep	0.000341629	0.775	0.23
	Shallow	0.000357105		0.27
E	Deep	0.000267712	0.215	0.28
	Shallow	0.000214128		0.24
Pre-Maxilla
Module	Depth	Disparity (PV)	P	Integration (Ro)
Full	Deep	0.00157	0.059	0.39
	Shallow	0.00106		0.38
A	Deep	0.000556484	0.015	0.43
	Shallow	0.000299438		0.4
B	Deep	0.000119756	0.313	0.46
	Shallow	9.85798e-05		0.52
C	Deep	0.000252955	0.961	0.36
	Shallow	0.000247705		0.29
D	Deep	0.000640882	0.209	0.38
	Shallow	0.000416117		0.39

[truncated: 1 more sheets: TableS11]
